# Supplementary material for: Overexpression of Arabidopsis Nucleotide-Binding and Leucine-Rich Repeat Genes RPS2 and RPM1(D505V) Confers Broad-Spectrum Disease Resistance in Rice
Source: Front Plant Sci. 2019 Apr 5;10:417. doi: 10.3389/fpls.2019.00417 (PMC6459959; doi:10.3389/fpls.2019.00417)
Supplement: TABLE S4 — Differentially expressed genes (DEGs) between Nipponbare and AtRPM1(D505V) transgenic plants. [file Table_4.XLSX]

## Sheet: diff-control-vs-case2-Pvalue-0.
	TABLE S4. Differentially expressed genes (DEGs) between Nipponbare and AtRPM1(D505V) transgenic plants
id	baseMean	baseMean_control_control	baseMean_case_case2	foldChange	log2FoldChange	pval	padj	up_down	fpkm_Sample_WT_1	fpkm_Sample_WT_2	fpkm_Sample_WT_3	fpkm_Sample_B	fpkm_Sample_C	fpkm_Sample_D	biotype	description	GO_id	GO_term	pathway	pathway_description
OS01G0113200	96.1519	46.5979	145.706	3.12688	1.64472	0.0207059	0.830074	Up	0.26153	0.487413	0.972331	1.14938	2.90618	1.25491	protein_coding	Os01g0113200 protein%3B Putative rust resistance kinase Lr10 [Source:UniProtKB/TrEMBL%3BAcc:Q94E34]	GO:0004672,GO:0004674,GO:0005524,GO:0006468,GO:0016301,GO:0016310,GO:0016772	protein kinase activity|protein serine/threonine kinase activity|ATP binding|protein phosphorylation|kinase activity|phosphorylation|transferase activity, transferring phosphorus-containing groups
OS01G0113650	201.683	125.416	277.951	2.21624	1.14811	0.00108239	0.163872	Up	1.26856	1.50856	3.74304	4.1396	5.23105	5.27568	protein_coding	Uncharacterized protein [Source:UniProtKB/TrEMBL%3BAcc:B9EYW3]	GO:0000166,GO:0004672,GO:0004674,GO:0005524,GO:0006468,GO:0016021,GO:0016301,GO:0016310,GO:0016772	nucleotide binding|protein kinase activity|protein serine/threonine kinase activity|ATP binding|protein phosphorylation|integral component of membrane|kinase activity|phosphorylation|transferase activity, transferring phosphorus-containing groups
OS01G0117200	782.391	1121.41	443.371	0.395369	-1.33873	1.84e-07	0.000130942	Down	13.3847	16.1048	11.3486	6.83123	3.58514	6.04621	protein_coding	Os01g0117200 protein%3B Putative rust resistance kinase Lr10%3B cDNA clone:J013020P18%2C full insert sequence [Source:UniProtKB/TrEMBL%3BAcc:Q5ZE77]	GO:0000166,GO:0004672,GO:0004674,GO:0005524,GO:0006468,GO:0016301,GO:0016310,GO:0016772	nucleotide binding|protein kinase activity|protein serine/threonine kinase activity|ATP binding|protein phosphorylation|kinase activity|phosphorylation|transferase activity, transferring phosphorus-containing groups
OS01G0117266	38.388	57.5715	19.2046	0.333577	-1.58391	4.36e-05	0.0139414	Down	2.28173	5.74731	2.22377	2.67529	1.17128	0.969723	protein_coding		GO:0030247	polysaccharide binding
OS01G0146200	11.7542	18.3034	5.20495	0.284371	-1.81416	0.00782156	0.570737	Down	1.41484	0.798074	0.721224	0.426561	0.315555	0.18868	protein_coding	Os01g0146200 protein%3B Uncharacterized protein [Source:UniProtKB/TrEMBL%3BAcc:B9ESU9]	GO:0016021	integral component of membrane
OS01G0165800	503.133	316.162	690.104	2.18275	1.12615	0.00341382	0.349618	Up	3.62671	4.19683	3.63673	5.28119	9.27322	10.3886	protein_coding	Uncharacterized protein [Source:UniProtKB/TrEMBL%3BAcc:B9ET12]
OS01G0175600	1.86884	3.73768	0	0	#NAME?	0.0380538	1	Down	0.0732365	0	0.0464017	0	0	0	protein_coding	Os01g0175600 protein%3B cDNA clone:J023086K01%2C full insert sequence [Source:UniProtKB/TrEMBL%3BAcc:Q0JQ90]	GO:0005452,GO:0005886,GO:0006820,GO:0008509,GO:0016020,GO:0016021,GO:0080139,GO:0098656	inorganic anion exchanger activity|plasma membrane|anion transport|anion transmembrane transporter activity|membrane|integral component of membrane|borate efflux transmembrane transporter activity|anion transmembrane transport
OS01G0186900	2775.07	1510.61	4039.52	2.6741	1.41905	0.0337733	0.982832	Up	26.7537	33.8361	245.008	209.028	339.902	338.681	protein_coding	cDNA clone:001-117-G12%2C full insert sequence [Source:UniProtKB/TrEMBL%3BAcc:B7EXU7]	GO:0005886,GO:0009507,GO:0016020	plasma membrane|chloroplast|membrane
OS01G0192900	14.7738	22.4128	7.13487	0.318339	-1.65136	0.00654984	0.520472	Down	1.29147	1.00205	1.21425	0.727934	0.183925	0.127536	protein_coding	Os01g0192900 protein%3B Putative 1-aminocyclopropane-1-carboxylate synthase 5 [Source:UniProtKB/TrEMBL%3BAcc:Q9FU17]	GO:0003824,GO:0009058,GO:0030170	catalytic activity|biosynthetic process|pyridoxal phosphate binding	dosa00270	Cysteine and methionine metabolism
OS01G0205600	11.4479	17.3437	5.55213	0.320123	-1.6433	0.0166274	0.787464	Down	2.48915	2.19909	3.15949	0.46855	0.582522	1.21534	protein_coding	Carnitine racemase-like%3B Os01g0205600 protein%3B cDNA clone:J013121K01%2C full insert sequence [Source:UniProtKB/TrEMBL%3BAcc:Q9LEA0]	GO:0003824,GO:0008152	catalytic activity|metabolic process
OS01G0215100	18.6918	25.3352	12.0484	0.475559	-1.0723	0.0468423	1	Down	2.64229	1.0878	4.17521	0	1.15664	0.801102	protein_coding		GO:0004185,GO:0006508	serine-type carboxypeptidase activity|proteolysis
OS01G0223900	4.12066	0.694792	7.54653	10.8616	3.44116	0.0111157	0.663018	Up	0.0413232	0	0	0.0608431	0.201073	0.203096	protein_coding	Serine/threonine-protein kinase [Source:UniProtKB/TrEMBL%3BAcc:Q9LDT8]	GO:0000166,GO:0004672,GO:0004674,GO:0005524,GO:0005886,GO:0006468,GO:0016021,GO:0016301,GO:0016310,GO:0016740,GO:0016772,GO:0048544	nucleotide binding|protein kinase activity|protein serine/threonine kinase activity|ATP binding|plasma membrane|protein phosphorylation|integral component of membrane|kinase activity|phosphorylation|transferase activity|transferase activity, transferring phosphorus-containing groups|recognition of pollen
OS01G0225000	92.3738	125.627	59.1207	0.470605	-1.08741	0.0104863	0.652838	Down	7.5516	9.14558	11.7642	3.97396	2.26842	5.47913	protein_coding	Os01g0225000 protein [Source:UniProtKB/TrEMBL%3BAcc:Q0JPF8]	GO:0000064,GO:0003735,GO:0005290,GO:0005476,GO:0005739,GO:0005743,GO:0006412,GO:0006561,GO:0006810,GO:0006839,GO:0006972,GO:0015181,GO:0015189,GO:0015817,GO:0015819,GO:0015822,GO:0016020,GO:0016021,GO:0043091,GO:0055085	L-ornithine transmembrane transporter activity|structural constituent of ribosome|L-histidine transmembrane transporter activity|carnitine:acyl carnitine antiporter activity|mitochondrion|mitochondrial inner membrane|translation|proline biosynthetic process|transport|mitochondrial transport|hyperosmotic response|arginine transmembrane transporter activity|L-lysine transmembrane transporter activi…
OS01G0254850	18.8766	8.90987	28.8434	3.23724	1.69477	0.0152657	0.766612	Up	0.965375	0.600515	1.27186	1.46777	3.90374	3.50629	protein_coding
OS01G0267300	11.2795	0.317071	22.242	70.1482	6.13233	2.89e-05	0.0100238	Up	0	0	0	0.815757	1.96009	3.44009	protein_coding	Putative serpin-Z12 [Source:UniProtKB/Swiss-Prot%3BAcc:Q5NBM0]	GO:0005615	extracellular space
OS01G0279000	5.26241	8.88198	1.64285	0.184964	-2.43468	0.0246045	0.908084	Down	0.069046	0.0677387	0.193	0	0	0.0410405	protein_coding	Os01g0279000 protein [Source:UniProtKB/TrEMBL%3BAcc:Q0JNM0]	GO:0008270,GO:0016021,GO:0019706,GO:0046872	zinc ion binding|integral component of membrane|protein-cysteine S-palmitoyltransferase activity|metal ion binding
OS01G0298400	36.5151	21.295	51.7352	2.42945	1.28063	0.0215894	0.852288	Up	1.31314	0.98461	3.09059	2.76382	5.09123	5.66224	protein_coding	Os01g0298400 protein%3B Putative typical P-type R2R3 Myb protein%3B Uncharacterized protein%3B cDNA%2C clone: J065186D02%2C full insert sequence [Source:UniProtKB/TrEMBL%3BAcc:Q93V35]	GO:0003677,GO:0003682	DNA binding|chromatin binding
OS01G0332100	14493.3	8947.62	20038.9	2.23958	1.16323	0.0269813	0.927498	Up	131.396	97.8999	240.092	196.002	463.081	391.802	protein_coding	Os01g0332100 protein%3B Putative neutral invertase%3B cDNA clone:J023002G12%2C full insert sequence [Source:UniProtKB/TrEMBL%3BAcc:Q5ZA22]	GO:0003824,GO:0008152,GO:0033926	catalytic activity|metabolic process|glycopeptide alpha-N-acetylgalactosaminidase activity
OS01G0339500	304.164	407.644	200.684	0.492303	-1.02238	1.22e-06	0.000723195	Down	11.2928	12.1191	12.0528	4.91946	7.69027	4.26659	protein_coding	Os01g0339500 protein%3B cDNA clone:J013052A02%2C full insert sequence [Source:UniProtKB/TrEMBL%3BAcc:Q0JN18]
OS01G0350000	143.495	193.917	93.0726	0.47996	-1.05901	1.74e-05	0.00708752	Down	10.3268	9.32294	9.74432	6.32497	3.62048	4.95964	protein_coding	Os01g0350000 protein%3B Putative benzoyl-CoA:benzyl alcohol/phenylethanol benzoyltransferase%3B BPBT%3B cDNA clone:J023102H06%2C full insert sequence [Source:UniProtKB/TrEMBL%3BAcc:Q8S222]	GO:0016740,GO:0016747	transferase activity|transferase activity, transferring acyl groups other than amino-acyl groups
OS01G0384800	1125.11	525.617	1724.61	3.28112	1.71419	0.000537634	0.0987269	Up	31.4874	41.7825	144.059	180.146	281.841	280.13	protein_coding	Os01g0384800 protein%3B Putative uncharacterized protein OSJNBb0093M23.18%3B Uncharacterized protein%3B cDNA clone:002-157-A09%2C full insert sequence%3B cDNA clone:J023034B07%2C full insert sequence [Source:UniProtKB/TrEMBL%3BAcc:Q5VNY3]
OS01G0389700	878.769	583.376	1174.16	2.0127	1.00913	0.0302079	0.963911	Up	27.1302	29.5671	90.1088	91.5536	119.04	97.1866	protein_coding	Os01g0389700 protein%3B Putative uncharacterized protein OJ1123_G09.11%3B Uncharacterized protein%3B cDNA clone:002-143-C02%2C full insert sequence [Source:UniProtKB/TrEMBL%3BAcc:Q5VNJ6]	GO:0016021	integral component of membrane
OS01G0519050	7.06355	2.37356	11.7535	4.95187	2.30797	0.0113206	0.663018	Up	0.0335408	0.0164092	0	0.124222	0.132227	0.0642817	protein_coding
OS01G0537250	1799.68	863.8	2735.57	3.1669	1.66307	0.0212349	0.841793	Up	59.9092	61.7575	65.6216	260.736	72.5674	278.174	protein_coding
OS01G0547600	306.366	418.988	193.745	0.46241	-1.11275	8.44e-06	0.00381385	Down	20.5741	21.8221	20.756	5.54618	4.18313	8.84715	protein_coding		GO:0009705,GO:0015112,GO:0015706,GO:0016021,GO:0055085	plant-type vacuole membrane|nitrate transmembrane transporter activity|nitrate transport|integral component of membrane|transmembrane transport	dosa00910	Nitrogen metabolism
OS01G0555100	54.7423	73.276	36.2086	0.49414	-1.01701	0.0022287	0.261626	Down	3.87045	4.60128	4.05239	2.40386	2.07134	2.77061	protein_coding	Os01g0555100 protein%3B Putative zinc finger transcription factor ZFP30%3B cDNA clone:002-180-E06%2C full insert sequence [Source:UniProtKB/TrEMBL%3BAcc:Q8RYZ5]	GO:0005622,GO:0008150,GO:0008270	intracellular|biological_process|zinc ion binding
OS01G0584100	7.0846	3.015	11.1542	3.69957	1.88736	0.0353237	0.988772	Up	0.145128	0.438468	0.278999	0	1.32203	0.607197	protein_coding	Os01g0584100 protein [Source:UniProtKB/TrEMBL%3BAcc:Q0JLP7]
OS01G0598400	61.2313	40.3576	82.1051	2.03444	1.02463	0.0113442	0.663018	Up	1.29584	1.18887	2.38526	2.6269	3.88506	3.76607	protein_coding	Os01g0598400 protein%3B Uncharacterized protein%3B cDNA clone:002-148-E10%2C full insert sequence [Source:UniProtKB/TrEMBL%3BAcc:Q0JLI0]	GO:0016829	lyase activity
OS01G0613500	12.4885	21.7058	3.27116	0.150704	-2.73021	0.000100968	0.0270993	Down	2.1564	1.86901	1.8342	0.319268	0.474103	0.100268	protein_coding	Cysteine proteinase-like%3B Os01g0613500 protein%3B cDNA clone:J023048F12%2C full insert sequence [Source:UniProtKB/TrEMBL%3BAcc:Q9FTI3]	GO:0004197,GO:0005615,GO:0005764,GO:0006508,GO:0008234,GO:0051603	cysteine-type endopeptidase activity|extracellular space|lysosome|proteolysis|cysteine-type peptidase activity|proteolysis involved in cellular protein catabolic process
OS01G0625300	29.3614	40.5467	18.1761	0.448275	-1.15754	0.0153894	0.766612	Down	2.0242	1.72394	1.01943	1.25258	0.442441	0.599627	protein_coding	Heat stress transcription factor C-1a [Source:UniProtKB/Swiss-Prot%3BAcc:Q6VBA4]	GO:0003677,GO:0003700,GO:0005634,GO:0006351,GO:0006355,GO:0009408,GO:0043565	DNA binding|transcription factor activity, sequence-specific DNA binding|nucleus|transcription, DNA-templated|regulation of transcription, DNA-templated|response to heat|sequence-specific DNA binding
OS01G0631800	30.6396	19.2131	42.0662	2.18946	1.13057	0.0407369	1	Up	0.455446	0.628187	3.66202	3.72761	2.92753	5.17744	protein_coding	Os01g0631800 protein%3B Putative uncharacterized protein B1158C05.14%3B Uncharacterized protein%3B cDNA clone:J023019C22%2C full insert sequence [Source:UniProtKB/TrEMBL%3BAcc:Q8RZJ7]	GO:0016021	integral component of membrane
OS01G0636400	30.8387	45.0051	16.6724	0.370455	-1.43263	0.00128083	0.185058	Down	2.43464	1.58919	2.50678	0.513621	0.762742	1.45564	protein_coding	Hydrolase-like%3B cDNA%2C clone: J065021L21%2C full insert sequence [Source:UniProtKB/TrEMBL%3BAcc:Q5VNP5]	GO:0003824,GO:0008152,GO:0016787	catalytic activity|metabolic process|hydrolase activity
OS01G0666000	17.9048	11.4185	24.3911	2.13609	1.09498	0.0424292	1	Up	0.230116	0.486694	0.356721	1.1299	0.703467	0.514498	protein_coding	Os01g0666000 protein%3B Phosphatidic acid phosphatase beta-like%3B Uncharacterized protein [Source:UniProtKB/TrEMBL%3BAcc:Q5SN48]	GO:0003824,GO:0005887,GO:0006644,GO:0007165,GO:0008152,GO:0008195,GO:0016020,GO:0046839	catalytic activity|integral component of plasma membrane|phospholipid metabolic process|signal transduction|metabolic process|phosphatidate phosphatase activity|membrane|phospholipid dephosphorylation
OS01G0666400	11.1583	16.1074	6.20916	0.385484	-1.37526	0.0426011	1	Down	1.64014	2.21147	1.49251	0.266431	0.612099	0.89982	protein_coding	Lipase class 3-like%3B Os01g0666400 protein [Source:UniProtKB/TrEMBL%3BAcc:Q8RZ95]
OS01G0667900	680.523	446.224	914.821	2.05014	1.03572	0.0413959	1	Up	29.5663	34.7313	71.9964	70.5741	135.831	91.5021	protein_coding	Monothiol glutaredoxin-S5 [Source:UniProtKB/Swiss-Prot%3BAcc:Q5QLR2]	GO:0005634,GO:0005737,GO:0009055,GO:0009751,GO:0009863,GO:0009867,GO:0015035,GO:0045454,GO:0046872,GO:0051537	nucleus|cytoplasm|electron carrier activity|response to salicylic acid|salicylic acid mediated signaling pathway|jasmonic acid mediated signaling pathway|protein disulfide oxidoreductase activity|cell redox homeostasis|metal ion binding|2 iron, 2 sulfur cluster binding
OS01G0681800	80.0964	52.6419	107.551	2.04306	1.03073	0.000456242	0.0883402	Up	7.5263	9.46369	5.96681	13.0562	16.4415	19.4622	protein_coding	Os01g0681800 protein%3B Putative uncharacterized protein P0019E03.27%3B Uncharacterized protein%3B cDNA clone:J013075M10%2C full insert sequence [Source:UniProtKB/TrEMBL%3BAcc:Q5QLG6]
OS01G0692400	37.7905	0.349829	75.2311	215.051	7.74853	1.16e-22	2.55e-19	Up	0	0	0.102805	6.94364	4.36667	7.09246	protein_coding	Os01g0692400 protein%3B Putative uncharacterized protein P0034C09.27%3B cDNA clone:002-170-E02%2C full insert sequence [Source:UniProtKB/TrEMBL%3BAcc:Q5N7R7]
OS01G0713600	10.1234	3.32234	16.9245	5.09417	2.34885	0.0020883	0.247664	Up	0.139007	0.102027	0	0.443939	0.208999	0.556196	protein_coding	B3 domain-containing protein LFL1 [Source:UniProtKB/Swiss-Prot%3BAcc:A4LBC0]	GO:0003677,GO:0008284,GO:0009793,GO:0010116,GO:0010262,GO:0010373	DNA binding|positive regulation of cell proliferation|embryo development ending in seed dormancy|positive regulation of abscisic acid biosynthetic process|somatic embryogenesis|negative regulation of gibberellin biosynthetic process
OS01G0719600	17.8939	24.8086	10.9792	0.442554	-1.17607	0.0317635	0.968203	Down	1.61747	1.73427	1.05115	1.19496	0.0653113	0.777107	protein_coding	Os01g0719600 protein%3B Putative uncharacterized protein P0480C01.37%3B Uncharacterized protein%3B cDNA clone:J023077M05%2C full insert sequence [Source:UniProtKB/TrEMBL%3BAcc:Q5JL91]	GO:0005737,GO:0030001,GO:0046872,GO:0046914,GO:0046916	cytoplasm|metal ion transport|metal ion binding|transition metal ion binding|cellular transition metal ion homeostasis
OS01G0739500	3370.08	1916.73	4823.43	2.51649	1.33141	4.08e-07	0.000270248	Up	59.3121	56.6364	55.1476	116.337	184.937	154.383	protein_coding	Cold induced protein-like%3B Os01g0739500 protein%3B Uncharacterized protein [Source:UniProtKB/TrEMBL%3BAcc:Q94JH8]	GO:0006979,GO:0016607,GO:0046686	response to oxidative stress|nuclear speck|response to cadmium ion
OS01G0783700	9.54694	3.01743	16.0765	5.32786	2.41356	0.00227659	0.263409	Up	0	0.677485	0.67613	1.25901	1.90368	1.77394	protein_coding	Os01g0783700 protein%3B Putative EF-hand Ca2+-binding protein CCD1%3B Uncharacterized protein%3B cDNA clone:002-188-B02%2C full insert sequence [Source:UniProtKB/TrEMBL%3BAcc:Q8LQQ2]	GO:0005509,GO:0009733,GO:0080167	calcium ion binding|response to auxin|response to karrikin
OS01G0793800	14.8647	7.41958	22.3099	3.00689	1.58827	0.0136913	0.729767	Up	0.634882	0.488931	0.815368	1.03599	2.37382	2.42046	protein_coding	Os01g0793800 protein%3B Putative uncharacterized protein P0684C02.8%3B Uncharacterized protein%3B cDNA clone:002-175-G02%2C full insert sequence [Source:UniProtKB/TrEMBL%3BAcc:Q8S1L0]
OS01G0794100	28.8328	18.0932	39.5724	2.18714	1.12905	0.0197082	0.81547	Up	1.07599	1.4089	3.56324	3.60434	5.26533	5.77451	protein_coding	Os01g0794100 protein%3B Putative uncharacterized protein P0684C02.14 [Source:UniProtKB/TrEMBL%3BAcc:Q8S1K6]
OS01G0796000	39.0099	15.8025	62.2174	3.93718	1.97716	4.74e-05	0.0147418	Up	1.21091	3.7345	3.6922	10.1433	15.9935	10.3669	protein_coding
OS01G0820000	25.0555	36.8209	13.2902	0.360942	-1.47016	0.00171988	0.222513	Down	1.10618	1.45724	1.72701	0.506424	0.31997	0.386353	protein_coding		GO:0005506,GO:0016705,GO:0020037,GO:0055114	iron ion binding|oxidoreductase activity, acting on paired donors, with incorporation or reduction of molecular oxygen|heme binding|oxidation-reduction process
OS01G0833500	12.2923	5.20738	19.3772	3.7211	1.89573	0.029967	0.960529	Up	0.0435856	0.0212158	0.202866	0.21943	0.640886	0.265744	protein_coding	Os01g0833500 protein%3B Putative serine carboxypeptidase II%3B Uncharacterized protein%3B cDNA clone:J033029C16%2C full insert sequence [Source:UniProtKB/TrEMBL%3BAcc:Q5QLC0]	GO:0004180,GO:0004185,GO:0005773,GO:0006508,GO:0051603	carboxypeptidase activity|serine-type carboxypeptidase activity|vacuole|proteolysis|proteolysis involved in cellular protein catabolic process
OS01G0841700	676.18	412.179	940.182	2.281	1.18967	0.00437086	0.408215	Up	8.4396	12.8815	37.2806	49.6266	54.3983	47.1138	protein_coding	Elicitor-responsive protein 1 [Source:UniProtKB/Swiss-Prot%3BAcc:Q0JHU5]	GO:0005622,GO:0006612,GO:0009963,GO:0010363	intracellular|protein targeting to membrane|positive regulation of flavonoid biosynthetic process|regulation of plant-type hypersensitive response
OS01G0851600	34.0867	45.7234	22.45	0.490995	-1.02622	0.0113398	0.663018	Down	5.86346	6.09541	6.46958	4.13278	2.21696	3.36342	protein_coding	Os01g0851600 protein%3B Putative steroid 5alpha-reductase%3B cDNA clone:J033034K18%2C full insert sequence [Source:UniProtKB/TrEMBL%3BAcc:Q8LQ34]	GO:0003865,GO:0005737,GO:0006629,GO:0008202,GO:0009416,GO:0009917,GO:0010268,GO:0016020,GO:0016021,GO:0016132,GO:0016627,GO:0050213,GO:0055114	3-oxo-5-alpha-steroid 4-dehydrogenase activity|cytoplasm|lipid metabolic process|steroid metabolic process|response to light stimulus|sterol 5-alpha reductase activity|brassinosteroid homeostasis|membrane|integral component of membrane|brassinosteroid biosynthetic process|oxidoreductase activity, acting on the CH-CH group of donors|progesterone 5-alpha-reductase activity|oxidation-reduction proce…	dosa00905	Brassinosteroid biosynthesis
OS01G0855600	370.557	165.112	576.003	3.48857	1.80263	0.00855765	0.594089	Up	3.85741	8.07943	13.2404	23.319	45.8049	23.2724	protein_coding	Os01g0855600 protein%3B Putative nematode-resistance protein%3B Uncharacterized protein%3B cDNA clone:J013095E24%2C full insert sequence [Source:UniProtKB/TrEMBL%3BAcc:Q7E5I4]	GO:0006952,GO:0006979,GO:0009751,GO:0009816	defense response|response to oxidative stress|response to salicylic acid|defense response to bacterium, incompatible interaction
OS01G0862600	23.3943	13.634	33.1547	2.43178	1.28201	0.0416676	1	Up	1.09031	1.06955	1.32489	1.50896	4.36368	3.31405	protein_coding	Os01g0862600 protein%3B Prolyl 4-hydroxylase alpha subunit-like%3B cDNA clone:002-142-B04%2C full insert sequence [Source:UniProtKB/TrEMBL%3BAcc:Q5N7G7]	GO:0003674,GO:0008150	molecular_function|biological_process
OS01G0863300	885.047	482.796	1287.3	2.66634	1.41486	0.0242113	0.902755	Up	15.0463	14.6502	45.1272	44.3005	99.5672	65.3084	protein_coding	Os01g0863300 protein [Source:UniProtKB/TrEMBL%3BAcc:Q0JHH7]	GO:0003677,GO:0003682,GO:0005634,GO:0006351,GO:0006355	DNA binding|chromatin binding|nucleus|transcription, DNA-templated|regulation of transcription, DNA-templated
OS01G0868000	173.213	108.555	237.871	2.19124	1.13175	0.0411075	1	Up	8.33458	11.5281	18.4104	15.1956	39.6381	23.4323	protein_coding	AP2 domain transcription factor-like%3B Os01g0868000 protein [Source:UniProtKB/TrEMBL%3BAcc:Q5N965]	GO:0003677,GO:0003700,GO:0005634,GO:0006351,GO:0006355	DNA binding|transcription factor activity, sequence-specific DNA binding|nucleus|transcription, DNA-templated|regulation of transcription, DNA-templated
OS01G0872900	10.6855	3.70492	17.666	4.76825	2.25346	0.00617079	0.50441	Up	0.11612	0.0453933	0.0249619	0.290705	0.511154	0.11454	protein_coding	Os01g0872900 protein%3B cDNA clone:002-111-B06%2C full insert sequence [Source:UniProtKB/TrEMBL%3BAcc:Q0JHB5]	GO:0005840,GO:0016788	ribosome|hydrolase activity, acting on ester bonds
OS01G0873000	11.0601	5.13213	16.9881	3.31014	1.72689	0.0125988	0.696308	Up	0.302181	0.151779	0.231814	0.6162	0.910531	0.534267	protein_coding	Os01g0873000 protein [Source:UniProtKB/TrEMBL%3BAcc:Q0JHB4]	GO:0005840	ribosome
OS01G0946500	72.2975	105.462	39.133	0.371063	-1.43026	0.000234289	0.0521201	Down	6.29196	8.34683	8.00394	0.544742	3.99271	3.92492	protein_coding	Os01g0946500 protein%3B Uncharacterized protein [Source:UniProtKB/TrEMBL%3BAcc:Q0JG30]	GO:0003824,GO:0004553,GO:0005618,GO:0005773,GO:0005886,GO:0005975,GO:0008152,GO:0009409,GO:0009617,GO:0009651,GO:0009817,GO:0016787,GO:0016798,GO:0048046	catalytic activity|hydrolase activity, hydrolyzing O-glycosyl compounds|cell wall|vacuole|plasma membrane|carbohydrate metabolic process|metabolic process|response to cold|response to bacterium|response to salt stress|defense response to fungus, incompatible interaction|hydrolase activity|hydrolase activity, acting on glycosyl bonds|apoplast
OS01G0952800	5.08743	1.04705	9.12781	8.71761	3.12393	0.00694605	0.531466	Up	0.0235368	0	0.0242792	0.160649	0.206532	0.138791	protein_coding	Os01g0952800 protein [Source:UniProtKB/TrEMBL%3BAcc:Q0JFZ0]	GO:0003677,GO:0005634,GO:0046983	DNA binding|nucleus|protein dimerization activity
OS01G0972000	142.589	90.8239	194.354	2.1399	1.09754	0.0355336	0.988772	Up	2.70259	2.91858	9.91992	9.86506	11.4879	15.0303	protein_coding	Os01g0972000 protein%3B RING-H2 finger protein-like%3B Uncharacterized protein%3B cDNA clone:001-206-A03%2C full insert sequence [Source:UniProtKB/TrEMBL%3BAcc:Q5JME3]	GO:0000209,GO:0008270,GO:0042787,GO:0043161,GO:0046872,GO:0061630	protein polyubiquitination|zinc ion binding|protein ubiquitination involved in ubiquitin-dependent protein catabolic process|proteasome-mediated ubiquitin-dependent protein catabolic process|metal ion binding|ubiquitin protein ligase activity
OS02G0116800	12.7155	6.52658	18.9044	2.89652	1.53432	0.0157308	0.771284	Up	0.166975	0.0409944	0.147078	0.427531	0.334881	0.353438	protein_coding	Os02g0116800 protein%3B Putative uncharacterized protein OJ1442_E05.21%3B cDNA clone:J033098O09%2C full insert sequence [Source:UniProtKB/TrEMBL%3BAcc:Q6ZGM2]	GO:0003677,GO:0005886,GO:0008150	DNA binding|plasma membrane|biological_process
OS02G0153400	54.3302	34.3341	74.3263	2.16479	1.11423	0.0288375	0.945599	Up	0.175902	0.233373	0.479612	0.357489	0.763573	0.793248	protein_coding	Os02g0153400 protein%3B Putative Phytosulfokine receptor [Source:UniProtKB/TrEMBL%3BAcc:Q67IT7]	GO:0001653,GO:0004672,GO:0004674,GO:0004888,GO:0005524,GO:0006468,GO:0009611,GO:0016020,GO:0016021,GO:0016772	peptide receptor activity|protein kinase activity|protein serine/threonine kinase activity|transmembrane signaling receptor activity|ATP binding|protein phosphorylation|response to wounding|membrane|integral component of membrane|transferase activity, transferring phosphorus-containing groups
OS02G0157100	8.44367	4.18822	12.6991	3.0321	1.60032	0.0392235	1	Up	0.0175502	0	0.0700333	0.167635	0.10479	0.103403	protein_coding
OS02G0161100	10.0621	2.02859	18.0956	8.92028	3.15709	0.0316515	0.968203	Up	0.0100234	0.0198062	0.0220031	0.116491	0.300545	0.0810547	protein_coding	Formin-like protein 10 [Source:UniProtKB/Swiss-Prot%3BAcc:Q6H7U3]
OS02G0216400	54.5331	15.6225	93.4437	5.98136	2.58047	0.00294699	0.316528	Up	0.435289	0.299084	0.326159	1.65011	1.83137	0.594105	protein_coding
OS02G0245800	806.59	497.144	1116.04	2.24489	1.16665	0.0085248	0.593255	Up	5.9828	5.66789	5.97319	7.59857	16.7167	13.0108	protein_coding	Potassium channel KAT1 [Source:UniProtKB/Swiss-Prot%3BAcc:Q6K3T2]	GO:0005216,GO:0005249,GO:0006811,GO:0006813,GO:0016020,GO:0055085	ion channel activity|voltage-gated potassium channel activity|ion transport|potassium ion transport|membrane|transmembrane transport
OS02G0252400	1.80457	0	3.60913	Inf	Inf	0.0454064	1	Up	0	0	0	0.0677924	0.383769	0.0660463	protein_coding	Dof zinc finger protein%3B Os02g0252400 protein%3B Putative Dof zinc finger protein [Source:UniProtKB/TrEMBL%3BAcc:Q6K537]	GO:0003677,GO:0006355	DNA binding|regulation of transcription, DNA-templated
OS02G0253700	3.32543	5.99237	0.658497	0.109889	-3.18588	0.0315562	0.968203	Down	0.113873	0.225867	0.0877147	0	0.0307875	0.0302886	protein_coding	Os02g0253700 protein%3B Putative uncharacterized protein P0463G12.23%3B cDNA clone:J023132O14%2C full insert sequence [Source:UniProtKB/TrEMBL%3BAcc:Q6ET11]
OS02G0270200	76.6703	41.3917	111.949	2.70463	1.43543	0.036571	0.991922	Up	0.53626	0.618764	0.909078	1.21183	2.85601	1.34969	protein_coding	Os02g0270200 protein [Source:UniProtKB/TrEMBL%3BAcc:Q0E256]	GO:0004252,GO:0005618,GO:0006508,GO:0008233,GO:0008236,GO:0016787,GO:0042802,GO:0043086	serine-type endopeptidase activity|cell wall|proteolysis|peptidase activity|serine-type peptidase activity|hydrolase activity|identical protein binding|negative regulation of catalytic activity
OS02G0285900	12.802	18.0802	7.52374	0.416131	-1.26489	0.044038	1	Down	0.30283	0.925721	0.546904	0.170541	0.250608	0.341077	protein_coding	Os02g0285900 protein%3B Putative uncharacterized protein OJ1115_D03.26 [Source:UniProtKB/TrEMBL%3BAcc:Q6KA60]	GO:0003677,GO:0005634,GO:0006351,GO:0006355	DNA binding|nucleus|transcription, DNA-templated|regulation of transcription, DNA-templated
OS02G0332700	24.7308	14.4032	35.0584	2.43407	1.28337	0.0175454	0.797738	Up	0.511483	1.40274	1.13707	1.66954	2.97753	2.90373	protein_coding	Os02g0332700 protein [Source:UniProtKB/TrEMBL%3BAcc:Q0E1J7]
OS02G0501350	10.7856	4.31361	17.2577	4.00076	2.00027	0.00573243	0.482378	Up	0	0.558428	0	1.18836	0.521721	0.517544	protein_coding
OS02G0527900	26.9063	36.5555	17.2572	0.472082	-1.08289	0.0172508	0.796219	Down	2.64599	1.35755	2.94883	1.17611	0.975643	1.19338	protein_coding	Receptor protein kinase-like [Source:UniProtKB/TrEMBL%3BAcc:Q6H6Q2]	GO:0016021,GO:0016301,GO:0016310,GO:0048544	integral component of membrane|kinase activity|phosphorylation|recognition of pollen
OS02G0528750	20.0525	27.0641	13.041	0.481855	-1.05333	0.0395694	1	Down	6.51084	2.09275	5.77535	1.51646	0	4.60392	protein_coding	Putative uncharacterized protein [Source:UniProtKB/TrEMBL%3BAcc:A3C7Q5]
OS02G0530100	2097.05	3094.28	1099.83	0.355441	-1.49232	2.69e-10	3.32e-07	Down	285.776	246.895	235.082	130.061	66.8151	94.1098	protein_coding	Copper chaperone homolog CCH [Source:UniProtKB/TrEMBL%3BAcc:Q6H759]	GO:0005737,GO:0006873,GO:0008308,GO:0016021,GO:0030001,GO:0046872,GO:0046914,GO:0046916	cytoplasm|cellular ion homeostasis|voltage-gated anion channel activity|integral component of membrane|metal ion transport|metal ion binding|transition metal ion binding|cellular transition metal ion homeostasis
OS02G0548700	120.077	47.8485	192.305	4.01903	2.00685	0.00920124	0.611904	Up	1.0114	2.28578	9.48544	11.8134	26.8605	18.0554	protein_coding	Os02g0548700 protein [Source:UniProtKB/TrEMBL%3BAcc:Q0E0I9]	GO:0000151,GO:0004842,GO:0016567,GO:0016874	ubiquitin ligase complex|ubiquitin-protein transferase activity|protein ubiquitination|ligase activity
OS02G0563000	23.1239	30.923	15.3248	0.49558	-1.01281	0.0356338	0.988772	Down	3.82838	2.94249	2.79208	1.02629	0.768182	1.50813	protein_coding	Kelch repeat-containing F-box family protein-like [Source:UniProtKB/TrEMBL%3BAcc:Q6ZGB6]
OS02G0569900	45.8998	63.0526	28.7469	0.45592	-1.13315	0.00156162	0.207703	Down	3.9235	3.57091	4.16423	1.69734	1.87615	1.9555	protein_coding	Os02g0569900 protein%3B Putative Cyt-P450 monooxygenase%3B cDNA clone:001-204-H06%2C full insert sequence [Source:UniProtKB/TrEMBL%3BAcc:Q6YTE2]	GO:0004497,GO:0005506,GO:0009055,GO:0016021,GO:0016491,GO:0016705,GO:0020037,GO:0046872,GO:0055114	monooxygenase activity|iron ion binding|electron carrier activity|integral component of membrane|oxidoreductase activity|oxidoreductase activity, acting on paired donors, with incorporation or reduction of molecular oxygen|heme binding|metal ion binding|oxidation-reduction process	dosa00904	Diterpenoid biosynthesis
OS02G0584700	487.445	236.018	738.872	3.13057	1.64643	7.84e-06	0.00365792	Up	17.2894	17.929	36.3128	60.1468	89.6635	93.7825	protein_coding	Os02g0584700 protein%3B Putative uncharacterized protein OSJNBa0016D04.44%3B Putative uncharacterized protein OSJNBb0056I22.9%3B cDNA%2C clone: J065178P16%2C full insert sequence [Source:UniProtKB/TrEMBL%3BAcc:Q6YY34]	GO:0005737,GO:0030001,GO:0046872,GO:0046914,GO:0046916	cytoplasm|metal ion transport|metal ion binding|transition metal ion binding|cellular transition metal ion homeostasis
OS02G0584800	784.834	409.02	1160.65	2.83763	1.50469	0.00187572	0.233138	Up	24.0137	31.2868	68.7855	83.7201	135.089	162.223	protein_coding	Os02g0584800 protein%3B Putative uncharacterized protein OSJNBa0016D04.46%3B Putative uncharacterized protein OSJNBb0056I22.11%3B cDNA%2C clone: J100074H07%2C full insert sequence [Source:UniProtKB/TrEMBL%3BAcc:Q6YY33]	GO:0005737,GO:0030001,GO:0046872,GO:0046914,GO:0046916	cytoplasm|metal ion transport|metal ion binding|transition metal ion binding|cellular transition metal ion homeostasis
OS02G0585100	44.8469	25.1811	64.5128	2.56195	1.35724	0.0216798	0.854525	Up	1.5364	1.84669	2.53137	2.89117	5.32811	6.77716	protein_coding	Putative uncharacterized protein OSJNBb0056I22.14 [Source:UniProtKB/TrEMBL%3BAcc:Q6YY31]	GO:0005737,GO:0030001,GO:0046872,GO:0046914,GO:0046916	cytoplasm|metal ion transport|metal ion binding|transition metal ion binding|cellular transition metal ion homeostasis
OS02G0585200	419.451	237.071	601.832	2.53862	1.34404	0.00129024	0.18534	Up	13.1278	14.6359	20.6291	29.1206	42.0595	58.1249	protein_coding	Os02g0585200 protein%3B Putative uncharacterized protein OSJNBb0056I22.16 [Source:UniProtKB/TrEMBL%3BAcc:Q6YY29]	GO:0005737,GO:0030001,GO:0046872,GO:0046914,GO:0046916	cytoplasm|metal ion transport|metal ion binding|transition metal ion binding|cellular transition metal ion homeostasis
OS02G0594700	38.5203	52.9424	24.0982	0.455177	-1.1355	0.00330336	0.344409	Down	3.91606	2.63762	3.88139	1.90009	1.3809	2.21971	protein_coding	Os02g0594700 protein [Source:UniProtKB/TrEMBL%3BAcc:Q0DZW7]
OS02G0613900	24.7076	39.9401	9.47499	0.23723	-2.07564	1.86e-05	0.00731831	Down	2.04911	1.67905	2.00778	0.307829	0.484544	0.673626	protein_coding	Putative adenine phosphoribosyltransferase form 2%3B cDNA clone:J023024J22%2C full insert sequence [Source:UniProtKB/TrEMBL%3BAcc:Q6K5Y7]	GO:0003999,GO:0005737,GO:0005886,GO:0006168,GO:0009116,GO:0016740,GO:0016757	adenine phosphoribosyltransferase activity|cytoplasm|plasma membrane|adenine salvage|nucleoside metabolic process|transferase activity|transferase activity, transferring glycosyl groups	dosa00230	Purine metabolism
OS02G0629000	21.8733	7.94293	35.8037	4.50762	2.17237	0.0155729	0.769532	Up	0.180847	0.255216	1.58829	1.69653	4.90428	2.91214	protein_coding	Os02g0629000 protein%3B Putative uncharacterized protein B1469H02.18%3B cDNA clone:001-103-G03%2C full insert sequence [Source:UniProtKB/TrEMBL%3BAcc:Q6K219]
OS02G0671100	26.111	16.8851	35.3368	2.09278	1.06542	0.0383369	1	Up	1.59967	2.45531	0.582857	2.84977	4.18954	2.30877	protein_coding	Os02g0671100 protein%3B Putative uncharacterized protein P0684A08.38%3B cDNA clone:002-146-G06%2C full insert sequence [Source:UniProtKB/TrEMBL%3BAcc:Q6ESP4]
OS02G0685200	12.5889	18.6424	6.53552	0.350574	-1.51221	0.0197113	0.81547	Down	0.5005	0.391598	0.684576	0.235316	0.195679	0.0997452	protein_coding	Os02g0685200 protein%3B Putative late elongated hypocoty [Source:UniProtKB/TrEMBL%3BAcc:Q6ZHD2]	GO:0003677,GO:0003682,GO:0005634,GO:0006351,GO:0006355	DNA binding|chromatin binding|nucleus|transcription, DNA-templated|regulation of transcription, DNA-templated
OS02G0706900	5.26347	9.22207	1.30487	0.141494	-2.82118	0.0116819	0.673082	Down	0.339513	0.412358	0.412358	0	0	0.179123	protein_coding	Putative hydrolase [Source:UniProtKB/TrEMBL%3BAcc:Q8S3R0]	GO:0016787	hydrolase activity
OS02G0731700	490.987	247.925	734.049	2.96077	1.56597	0.0264216	0.92019	Up	11.7543	11.5883	8.95811	13.5868	45.136	41.0228	protein_coding	Zinc finger protein-like [Source:UniProtKB/TrEMBL%3BAcc:Q6Z2L0]	GO:0005622,GO:0008270	intracellular|zinc ion binding
OS02G0733500	80.6847	48.4061	112.963	2.33366	1.22259	0.0239937	0.899533	Up	2.36262	1.97286	7.32701	6.32762	11.1478	11.1299	protein_coding	Probable calcium-binding protein CML20 [Source:UniProtKB/Swiss-Prot%3BAcc:Q6Z2J1]	GO:0005509	calcium ion binding
OS02G0768300	45.0548	61.339	28.7707	0.469044	-1.0922	0.00223361	0.261626	Down	3.11475	3.37725	1.92401	1.10321	1.0396	2.02224	protein_coding	Os02g0768300 protein%3B Putative nodulin MtN21%3B cDNA clone:J033030K15%2C full insert sequence [Source:UniProtKB/TrEMBL%3BAcc:Q6ZGK2]	GO:0003333,GO:0005886,GO:0015171,GO:0016020,GO:0016021,GO:0022857,GO:0032973,GO:0043090,GO:0080144	amino acid transmembrane transport|plasma membrane|amino acid transmembrane transporter activity|membrane|integral component of membrane|transmembrane transporter activity|amino acid export|amino acid import|amino acid homeostasis
OS02G0770500	3.80597	0.699658	6.91228	9.87951	3.30444	0.0341094	0.985217	Up	0	0	0.0577238	0.0299132	0.32824	0.27171	protein_coding	Putative uncharacterized protein [Source:UniProtKB/TrEMBL%3BAcc:B9F3G2]	GO:0000041,GO:0003700,GO:0006355,GO:0006826,GO:0010043,GO:0010106,GO:0010167,GO:0015706,GO:0043565,GO:0044212	transition metal ion transport|transcription factor activity, sequence-specific DNA binding|regulation of transcription, DNA-templated|iron ion transport|response to zinc ion|cellular response to iron ion starvation|response to nitrate|nitrate transport|sequence-specific DNA binding|transcription regulatory region DNA binding
OS02G0770800	113.023	151.031	75.0143	0.496682	-1.00961	0.00817894	0.579097	Down	3.67456	5.21068	3.94589	2.59182	0.801092	3.44196	protein_coding	Nitrate reductase [Source:UniProtKB/TrEMBL%3BAcc:Q6ZHH7]	GO:0005506,GO:0005773,GO:0005886,GO:0006809,GO:0008940,GO:0009055,GO:0009416,GO:0009610,GO:0009703,GO:0016491,GO:0020037,GO:0030151,GO:0042128,GO:0043546,GO:0046857,GO:0046872,GO:0050464,GO:0050660,GO:0055114	iron ion binding|vacuole|plasma membrane|nitric oxide biosynthetic process|nitrate reductase activity|electron carrier activity|response to light stimulus|response to symbiotic fungus|nitrate reductase (NADH) activity|oxidoreductase activity|heme binding|molybdenum ion binding|nitrate assimilation|molybdopterin cofactor binding|oxidoreductase activity, acting on other nitrogenous compounds as don…	dosa00910	Nitrogen metabolism
OS02G0772100	136.742	0.317071	273.167	861.534	9.75076	0.0408414	1	Up	0	0.0365042	0	29.0088	1.14602	0.11093	protein_coding
OS02G0782500	35.6655	50.8066	20.5245	0.403973	-1.30767	0.001169	0.171512	Down	6.23373	3.77009	5.81742	2.95916	1.89184	2.07586	protein_coding	18.6 kDa class III heat shock protein [Source:UniProtKB/Swiss-Prot%3BAcc:Q6K7E9]			dosa04141	Protein processing in endoplasmic reticulum
OS02G0790500	2800.98	1586.09	4015.88	2.53193	1.34024	0.00337401	0.347951	Up	28.2985	26.4753	37.766	48.616	95.4259	70.8444	protein_coding	Os02g0790500 protein [Source:UniProtKB/TrEMBL%3BAcc:Q0DWW9]	GO:0003824,GO:0005992	catalytic activity|trehalose biosynthetic process
OS02G0791500	397.35	247.058	547.641	2.21665	1.14838	0.0424102	1	Up	5.73348	9.47617	25.5287	20.0693	34.6151	37.9823	protein_coding	Os02g0791500 protein%3B Putative nucleotide sugar epimerase%3B UDP-glucuronic acid 4-epimerase isoform 2 [Source:UniProtKB/TrEMBL%3BAcc:Q6K9M5]	GO:0003824,GO:0005975,GO:0016021,GO:0016857,GO:0044237,GO:0050378,GO:0050662	catalytic activity|carbohydrate metabolic process|integral component of membrane|racemase and epimerase activity, acting on carbohydrates and derivatives|cellular metabolic process|UDP-glucuronate 4-epimerase activity|coenzyme binding	dosa00520	Amino sugar and nucleotide sugar metabolism
OS02G0793150	2.06013	4.12027	0	0	#NAME?	0.0268486	0.925172	Down	0.173448	0.068642	0.146548	0	0	0	protein_coding
OS02G0826000	1.78905	0	3.5781	Inf	Inf	0.0459986	1	Up	0	0	0	0.0147471	0.0455251	0.0451552	protein_coding	Os02g0826000 protein [Source:UniProtKB/TrEMBL%3BAcc:Q0DW91]
OS03G0105500	6.03776	0	12.0755	Inf	Inf	1.45e-05	0.00607665	Up	0	0	0	0.257646	0.303258	0.269433	protein_coding	Os03g0105500 protein [Source:UniProtKB/TrEMBL%3BAcc:Q0DVZ6]
OS03G0115350	8.0303	2.66517	13.3954	5.02612	2.32944	0.00678051	0.526771	Up	0.0484021	0.189398	0.147307	0.727899	0.71936	0.39004	protein_coding
OS03G0115700	17.7193	6.06275	29.3759	4.8453	2.27659	7.37e-05	0.0211427	Up	0.129509	0.382274	0.491485	1.65569	1.48107	1.66988	protein_coding	Os03g0115700 protein%3B Oxidoreductase%2C short chain dehydrogenase/reductase family protein%2C expressed%3B Putative uncharacterized protein OSJNBa0090O10.25%3B cDNA clone:J013107I12%2C full insert sequence [Source:UniProtKB/TrEMBL%3BAcc:Q8GZV9]	GO:0008152,GO:0016491,GO:0055114	metabolic process|oxidoreductase activity|oxidation-reduction process
OS03G0115800	807.002	2.05892	1611.94	782.909	9.6127	4.74e-152	1.35e-147	Up	0.102647	0	0.078511	58.7648	44.9847	52.8783	protein_coding	Os03g0115800 protein%3B cDNA clone:001-124-D04%2C full insert sequence [Source:UniProtKB/TrEMBL%3BAcc:Q0DVR9]
OS03G0129100	1757.27	1133.63	2380.91	2.10025	1.07056	0.0146866	0.755923	Up	17.4977	16.1029	33.0056	33.0916	61.8087	46.0991	protein_coding	MLO-like protein [Source:UniProtKB/TrEMBL%3BAcc:Q9SNK5]	GO:0005516,GO:0005886,GO:0006952,GO:0009607,GO:0016020,GO:0016021	calmodulin binding|plasma membrane|defense response|response to biotic stimulus|membrane|integral component of membrane
OS03G0129400	631.414	886.274	376.554	0.424873	-1.2349	2.47e-05	0.008775	Down	98.0104	77.9191	72.8497	60.7907	24.9503	37.9976	protein_coding	Os03g0129400 protein [Source:UniProtKB/TrEMBL%3BAcc:Q0DVH6]
OS03G0141700	9.68318	4.68159	14.6848	3.1367	1.64925	0.0481912	1	Up	0.142257	0.103584	0	0.13613	0.159216	0.401219	protein_coding	Expressed protein%3B Os03g0141700 protein%3B cDNA clone:J033115I21%2C full insert sequence [Source:UniProtKB/TrEMBL%3BAcc:Q10RY5]
OS03G0152000	509.005	255.409	762.601	2.98581	1.57812	0.0168432	0.79247	Up	5.95476	5.80212	22.1683	22.409	52.3025	38.4297	protein_coding	Heavy metal-associated domain containing protein%2C expressed%3B Os03g0152000 protein [Source:UniProtKB/TrEMBL%3BAcc:Q10RN8]	GO:0005737,GO:0030001,GO:0046872,GO:0046914,GO:0046916	cytoplasm|metal ion transport|metal ion binding|transition metal ion binding|cellular transition metal ion homeostasis
OS03G0158000	3.10844	0.317071	5.89981	18.6072	4.21779	0.0176992	0.799638	Up	0	0	0	0.504822	0.814338	0.487416	protein_coding	Putative uncharacterized protein [Source:UniProtKB/TrEMBL%3BAcc:B9FBE6]
OS03G0181400	2.94991	0	5.89981	Inf	Inf	0.0050359	0.439683	Up	0	0	0	0.0938684	0.178142	0.0777297	protein_coding	Membrane associated salt-inducible protein%2C putative%2C expressed%3B Os03g0181400 protein%3B Putative uncharacterized protein OSJNBb0076N15.11%3B cDNA clone:001-124-G07%2C full insert sequence [Source:UniProtKB/TrEMBL%3BAcc:Q8H7L3]
OS03G0187800	9.73151	2.0007	17.4623	8.7281	3.12567	0.0326138	0.976115	Up	0	0.307603	0.296255	0.540754	3.24183	1.34114	protein_coding	Expressed protein%3B Os03g0187800 protein%3B Putative uncharacterized protein OJ1217B09.4 [Source:UniProtKB/TrEMBL%3BAcc:Q8H7P2]	GO:0005215,GO:0016020,GO:0016021	transporter activity|membrane|integral component of membrane
OS03G0197100	6150.15	8214.74	4085.55	0.497344	-1.00768	4.17e-05	0.0134748	Down	327.275	316.817	243.648	215.953	103.753	135.422	protein_coding	Mannitol transporter%2C putative%2C expressed%3B Os03g0197100 protein%3B cDNA clone:J023048F11%2C full insert sequence [Source:UniProtKB/TrEMBL%3BAcc:Q10QG5]	GO:0005215,GO:0005351,GO:0005355,GO:0005887,GO:0006810,GO:0015992,GO:0016020,GO:0016021,GO:0022857,GO:0022891,GO:0035428,GO:0046323,GO:0055085,GO:1904659	transporter activity|sugar:proton symporter activity|glucose transmembrane transporter activity|integral component of plasma membrane|transport|proton transport|membrane|integral component of membrane|transmembrane transporter activity|substrate-specific transmembrane transporter activity|hexose transmembrane transport|glucose import|transmembrane transport|glucose transmembrane transport
OS03G0281900	7.758	12.2395	3.27649	0.267698	-1.90132	0.0247894	0.908084	Down	0.444025	0.387602	0.554323	0.120121	0.183228	0.0769143	protein_coding	ABC transporter G family member 5 [Source:UniProtKB/Swiss-Prot%3BAcc:Q8H8V7]	GO:0000166,GO:0005524,GO:0005775,GO:0005886,GO:0006200,GO:0007034,GO:0009624,GO:0016020,GO:0016887,GO:0017111	nucleotide binding|ATP binding|vacuolar lumen|plasma membrane|obsolete ATP catabolic process|vacuolar transport|response to nematode|membrane|ATPase activity|nucleoside-triphosphatase activity
OS03G0285200	108.566	59.8323	157.299	2.62901	1.39452	0.042223	1	Up	2.00145	2.45411	3.94098	3.94307	11.2313	7.15702	protein_coding	Os03g0285200 protein%3B Putative uncharacterized protein OSJNBa0013D02.12 [Source:UniProtKB/TrEMBL%3BAcc:Q8GZZ0]
OS03G0285800	1541.05	1015.06	2067.04	2.03637	1.026	0.0411183	1	Up	14.9157	24.0814	69.4077	67.6634	89.4748	76.7886	protein_coding	Mitogen-activated protein kinase 5 [Source:UniProtKB/Swiss-Prot%3BAcc:Q10N20]	GO:0000165,GO:0000166,GO:0000169,GO:0001666,GO:0004672,GO:0004674,GO:0004707,GO:0005524,GO:0005622,GO:0006355,GO:0006468,GO:0006612,GO:0006970,GO:0006979,GO:0007165,GO:0009409,GO:0009555,GO:0009595,GO:0009611,GO:0009617,GO:0009697,GO:0009738,GO:0009814,GO:0009862,GO:0009863,GO:0009867,GO:0010120,GO:0010183,GO:0010200,GO:0010224,GO:0010229,GO:0010310,GO:0010363,GO:0010374,GO:0016301,GO:0016310,GO:…	MAPK cascade|nucleotide binding|activation of MAPK activity involved in osmosensory signaling pathway|response to hypoxia|protein kinase activity|protein serine/threonine kinase activity|MAP kinase activity|ATP binding|intracellular|regulation of transcription, DNA-templated|protein phosphorylation|protein targeting to membrane|response to osmotic stress|response to oxidative stress|signal transd…	dosa04016	MAPK signaling pathway - plant
OS03G0292700	78.3501	113.659	43.0414	0.378689	-1.40091	2.24e-06	0.00127793	Down	9.11971	12.5641	13.0117	4.51535	3.60185	5.11139	protein_coding	Protein kinase domain containing protein%2C expressed [Source:UniProtKB/TrEMBL%3BAcc:Q10MW9]	GO:0000166,GO:0004672,GO:0004674,GO:0005524,GO:0006468,GO:0016301,GO:0016310,GO:0016772	nucleotide binding|protein kinase activity|protein serine/threonine kinase activity|ATP binding|protein phosphorylation|kinase activity|phosphorylation|transferase activity, transferring phosphorus-containing groups
OS03G0299700	239.148	0.664467	477.632	718.819	9.48949	6.73e-05	0.0197358	Up	0.0420413	0.0413135	0	25.4922	0	35.5889	protein_coding	Putative uncharacterized protein [Source:UniProtKB/TrEMBL%3BAcc:B9F7V7]
OS03G0305400	14.3295	5.71049	22.9485	4.01866	2.00671	0.00138961	0.191074	Up	0.166758	0.568014	0.493471	1.1689	2.16462	1.14967	protein_coding	Os03g0305400 protein%3B Universal stress protein family protein%2C expressed [Source:UniProtKB/TrEMBL%3BAcc:Q10MK7]	GO:0002238,GO:0003674,GO:0005773,GO:0006950	response to molecule of fungal origin|molecular_function|vacuole|response to stress
OS03G0307500	25.2053	34.4941	15.9164	0.461425	-1.11583	0.0264454	0.92019	Down	9.56771	5.12479	9.67292	5.33193	1.94287	2.61073	protein_coding
OS03G0334200	620.596	412.203	828.989	2.01112	1.008	0.02865	0.943169	Up	3.6557	4.21877	11.4037	11.5838	17.091	12.7497	protein_coding	Expressed protein%3B Os03g0334200 protein%3B cDNA clone:J013058K09%2C full insert sequence%3B cDNA clone:J013066N20%2C full insert sequence [Source:UniProtKB/TrEMBL%3BAcc:Q10LU7]
OS03G0348500	7.96472	0.699658	15.2298	21.7674	4.4441	0.0386114	1	Up	0	0	0	0.730371	0	0.144067	protein_coding
OS03G0417700	21.9	29.3867	14.4132	0.490468	-1.02777	0.0347579	0.988772	Down	1.53916	1.63303	1.98645	0.620805	0.854972	0.895038	protein_coding	Putative cytochrome P-450 [Source:UniProtKB/TrEMBL%3BAcc:Q7Y1K4]	GO:0004497,GO:0005506,GO:0005783,GO:0008284,GO:0009055,GO:0010075,GO:0010338,GO:0016020,GO:0016021,GO:0016491,GO:0016705,GO:0016709,GO:0020037,GO:0035265,GO:0040009,GO:0044550,GO:0046622,GO:0046872,GO:0048437,GO:0055114	monooxygenase activity|iron ion binding|endoplasmic reticulum|positive regulation of cell proliferation|electron carrier activity|regulation of meristem growth|leaf formation|membrane|integral component of membrane|oxidoreductase activity|oxidoreductase activity, acting on paired donors, with incorporation or reduction of molecular oxygen|oxidoreductase activity, acting on paired donors, with inc…
OS03G0426350	276.398	34.3797	518.415	15.0791	3.91448	6.72e-41	2.39e-37	Up	3.89936	5.43678	2.43392	55.0603	68.093	56.5588	protein_coding
OS03G0558700	16.1178	22.1491	10.0865	0.455389	-1.13483	0.0487662	1	Down	2.51364	0.90569	1.59767	0.74277	0.807197	0.954181	protein_coding	Os03g0558700 protein [Source:UniProtKB/TrEMBL%3BAcc:Q0DQU0]
OS03G0569000	22.9284	0	45.8567	Inf	Inf	2.3e-15	4.09e-12	Up	0	0	0	0.74921	0.493019	0.440691	protein_coding	Os03g0569000 protein [Source:UniProtKB/TrEMBL%3BAcc:Q0DQR0]
OS03G0593100	147.848	203.527	92.1688	0.452857	-1.14287	2.69e-06	0.00144217	Down	10.602	14.2235	14.1545	6.95516	4.88606	6.60843	protein_coding	Os03g0593100 protein%3B Putative uncharacterized protein OSJNBb0056O10.6 [Source:UniProtKB/TrEMBL%3BAcc:Q6ATT5]
OS03G0629800	85.6368	0.317071	170.957	539.174	9.07461	1.1e-34	3.49e-31	Up	0	0.0623142	0	8.54834	8.5589	12.4929	protein_coding
OS03G0666800	14.143	5.70806	22.578	3.95547	1.98385	0.00164232	0.214428	Up	0.25659	0.441071	0.384863	1.17903	1.78143	1.4914	protein_coding	Uncharacterized protein [Source:UniProtKB/TrEMBL%3BAcc:A2ZPY9]
OS03G0773600	125.169	77.5144	172.824	2.22958	1.15677	0.0333026	0.982832	Up	1.13098	1.02721	0.872417	1.95409	3.61819	1.47587	protein_coding	Kinesin motor domain containing protein%2C expressed%3B Os03g0773600 protein%3B cDNA clone:J033125G15%2C full insert sequence [Source:UniProtKB/TrEMBL%3BAcc:Q10E64]	GO:0000166,GO:0003777,GO:0005524,GO:0005871,GO:0005874,GO:0005875,GO:0007018,GO:0008017,GO:0016887	nucleotide binding|microtubule motor activity|ATP binding|kinesin complex|microtubule|microtubule associated complex|microtubule-based movement|microtubule binding|ATPase activity
OS03G0857000	131.23	54.3364	208.124	3.83029	1.93746	1.25e-13	1.78e-10	Up	4.68806	5.27617	3.43337	14.6729	18.1633	16.3406	protein_coding
OS04G0128700	82.2626	53.0869	111.438	2.09917	1.06982	0.00509206	0.443227	Up	2.32255	2.9047	5.66728	8.08802	9.08662	6.20015	protein_coding	B1340F09.17 protein%3B OSJNBa0027H09.8 protein%3B Os04g0128700 protein [Source:UniProtKB/TrEMBL%3BAcc:Q7XP31]	GO:0016021	integral component of membrane
OS04G0142400	339.628	195.831	483.425	2.46858	1.30368	3.31e-07	0.000224636	Up	2.48256	2.71455	5.31701	8.30278	8.76293	6.75834	protein_coding	OSJNBb0049I21.1 protein%3B Os04g0142400 protein%3B cDNA clone:J033116L09%2C full insert sequence [Source:UniProtKB/TrEMBL%3BAcc:Q7XRV9]
OS04G0149400	330.931	217.079	444.782	2.04894	1.03488	0.000114456	0.0293491	Up	15.9916	13.4537	21.7971	30.1361	34.7336	38.3762	protein_coding	Os04g0149400 protein [Source:UniProtKB/TrEMBL%3BAcc:Q0JF62]
OS04G0168300	40.9811	0	81.9623	Inf	Inf	0.0427275	1	Up	0	0	0	3.28953	45.7134	0.231341	protein_coding	Os04g0168300 protein [Source:UniProtKB/TrEMBL%3BAcc:Q0JF31]	GO:0016021	integral component of membrane
OS04G0172100	29.7789	19.162	40.3958	2.10812	1.07596	0.0101403	0.645689	Up	0.357429	0.185265	0.29127	0.709002	0.519276	0.605675	protein_coding
OS04G0172560	21.0025	12.8081	29.1969	2.27956	1.18876	0.0294377	0.952143	Up	2.35886	3.2017	2.86882	3.65541	8.92965	6.23714	protein_coding
OS04G0175600	289.824	484.299	95.3493	0.196881	-2.3446	3.1e-26	8.03e-23	Down	19.8985	23.1582	21.0974	2.98027	5.74275	3.64215	protein_coding	OSJNBa0039G19.10 protein%3B Os04g0175600 protein%3B cDNA clone:J013102F20%2C full insert sequence [Source:UniProtKB/TrEMBL%3BAcc:Q7XXD3]	GO:0005829,GO:0008168,GO:0008171,GO:0008757,GO:0019438,GO:0032259,GO:0046983	cytosol|methyltransferase activity|O-methyltransferase activity|S-adenosylmethionine-dependent methyltransferase activity|aromatic compound biosynthetic process|methylation|protein dimerization activity
OS04G0193950	3.21215	5.77114	0.653165	0.113178	-3.14334	0.0396932	1	Down	0.0324392	0.0427781	0.0715352	0.0102885	0.0110592	0	protein_coding		GO:0043531	ADP binding
OS04G0208450	32.1509	44.589	19.7128	0.442099	-1.17756	0.0142806	0.741066	Down	9.25294	8.81731	7.07791	8.00995	1.62922	2.50086	protein_coding
OS04G0249600	295.583	71.5098	519.656	7.26692	2.86134	6.75e-15	1.13e-11	Up	1.58188	1.85955	1.67452	8.72621	9.56525	7.91551	protein_coding	Putative uncharacterized protein [Source:UniProtKB/TrEMBL%3BAcc:B9FE35]
OS04G0252850	25.327	39.2573	11.3967	0.290306	-1.78435	0.0127776	0.702101	Down	10.325	6.10329	3.53164	2.31308	1.39204	2.32555	protein_coding
OS04G0314100	20.1587	29.6184	10.6989	0.361223	-1.46904	0.00489983	0.435461	Down	2.55965	2.04748	3.34739	1.71015	0.540714	1.24069	protein_coding		GO:0008152,GO:0016758	metabolic process|transferase activity, transferring hexosyl groups
OS04G0339800	36.465	21.864	51.066	2.33562	1.22381	0.00184852	0.232808	Up	1.1889	1.18985	1.04948	0.672251	1.57937	0.449161	protein_coding		GO:0004672,GO:0005524,GO:0006468	protein kinase activity|ATP binding|protein phosphorylation
OS04G0340100	27.08	17.6256	36.5345	2.0728	1.05158	0.0173571	0.796219	Up	0.469951	0.64076	0.77337	1.93176	1.83513	2.11331	protein_coding	Putative uncharacterized protein [Source:UniProtKB/TrEMBL%3BAcc:B9FEH9]
OS04G0355401	407.567	654.169	160.964	0.246059	-2.02292	1.35e-07	0.000100765	Down	12.7894	12.8053	12.6909	2.48497	0.179255	6.77217	protein_coding
OS04G0387300	81.5578	40.5342	122.581	3.02414	1.59653	0.020692	0.830074	Up	0.786062	0.747626	0.437743	4.34826	1.04151	4.19651	protein_coding		GO:0003677	DNA binding
OS04G0397800	91.4147	0.317071	182.512	575.62	9.16897	9.82e-24	2.33e-20	Up	0	0.0658515	0	7.34235	4.95862	9.31113	protein_coding
OS04G0401900	12.4089	17.9124	6.90549	0.385515	-1.37514	0.0328315	0.978851	Down	0.534435	0.647435	0.695785	0.0413999	0.333449	0.292934	protein_coding	Os04g0401900 protein [Source:UniProtKB/TrEMBL%3BAcc:Q0JDI2]
OS04G0439600	26.2443	17.4583	35.0303	2.00652	1.00469	0.0483585	1	Up	0.229145	0.981441	1.10111	1.1292	1.78979	1.79505	protein_coding	OJ000114_01.11 protein%3B Os04g0439600 protein [Source:UniProtKB/TrEMBL%3BAcc:Q7XQG6]	GO:0000166,GO:0004672,GO:0004674,GO:0005524,GO:0006468,GO:0016021,GO:0016772	nucleotide binding|protein kinase activity|protein serine/threonine kinase activity|ATP binding|protein phosphorylation|integral component of membrane|transferase activity, transferring phosphorus-containing groups
OS04G0442300	34.9567	47.9934	21.92	0.45673	-1.13059	0.034269	0.985251	Down	1.52811	2.13286	0.622857	0.591251	0.634922	0.302588	protein_coding	A-type response regulator%3B Os04g0442300 protein%3B TypeA response regulator 1%3B cDNA clone:001-203-C10%2C full insert sequence%3B cDNA clone:J023139D11%2C full insert sequence [Source:UniProtKB/TrEMBL%3BAcc:Q2HWG4]	GO:0000156,GO:0000160,GO:0005622,GO:0006351,GO:0006355,GO:0009736,GO:0035556	phosphorelay response regulator activity|phosphorelay signal transduction system|intracellular|transcription, DNA-templated|regulation of transcription, DNA-templated|cytokinin-activated signaling pathway|intracellular signal transduction	dosa04075	Plant hormone signal transduction
OS04G0445300	1.82579	3.65157	0	0	#NAME?	0.0394131	1	Down	0	1.47665	1.08684	0	0	0	protein_coding	OSJNBa0027P08.11 protein%3B Os04g0445300 protein%3B cDNA clone:001-110-H04%2C full insert sequence [Source:UniProtKB/TrEMBL%3BAcc:Q7XUW7]	GO:0004857,GO:0030599,GO:0043086	enzyme inhibitor activity|pectinesterase activity|negative regulation of catalytic activity
OS04G0455700	24.6885	34.0642	15.3127	0.449525	-1.15353	0.0142395	0.740949	Down	4.54739	2.39572	3.96636	1.36299	1.22111	2.06935	protein_coding	OSJNBa0006M15.15 protein%3B Os04g0455700 protein [Source:UniProtKB/TrEMBL%3BAcc:Q7XRF2]
OS04G0464100	73.2529	46.8628	99.6431	2.12627	1.08833	0.0300577	0.962352	Up	1.48303	1.93247	4.51327	4.12682	7.30502	6.30816	protein_coding	Os04g0464100 protein%3B cDNA clone:J013129I02%2C full insert sequence [Source:UniProtKB/TrEMBL%3BAcc:Q0JCK8]	GO:0005737,GO:0030001,GO:0046914,GO:0046916	cytoplasm|metal ion transport|transition metal ion binding|cellular transition metal ion homeostasis
OS04G0475100	4.89939	1.01186	8.78691	8.6839	3.11834	0.00891202	0.601926	Up	0.0227433	0.0111475	0	0.109382	0.0806754	0.0905374	protein_coding	OSJNBa0022H21.6 protein [Source:UniProtKB/TrEMBL%3BAcc:Q7XKV1]	GO:0000166,GO:0004672,GO:0004674,GO:0005524,GO:0005886,GO:0006468,GO:0016021,GO:0016772	nucleotide binding|protein kinase activity|protein serine/threonine kinase activity|ATP binding|plasma membrane|protein phosphorylation|integral component of membrane|transferase activity, transferring phosphorus-containing groups
OS04G0482300	2082.7	2779.56	1385.84	0.498584	-1.00409	1.67e-08	1.48e-05	Down	177.178	174.249	194.335	106.631	83.3879	86.5959	protein_coding	OSJNBb0011N17.18 protein%3B Os04g0482300 protein%3B cDNA clone:002-103-B11%2C full insert sequence [Source:UniProtKB/TrEMBL%3BAcc:Q7XUP5]	GO:0003712,GO:0004402,GO:0005634,GO:0006355,GO:0008270,GO:0016573	transcription cofactor activity|histone acetyltransferase activity|nucleus|regulation of transcription, DNA-templated|zinc ion binding|histone acetylation
OS04G0483450	49.9646	0	99.9292	Inf	Inf	4.49e-05	0.0142027	Up	0	0	0	2.50482	0.6226	1.12217	protein_coding
OS04G0502100	4.30169	7.3213	1.28208	0.175117	-2.51361	0.0381417	1	Down	0.100683	0.183011	0.0890084	0.0656469	0	0	protein_coding	Os04g0502100 protein%3B cDNA clone:J013092M08%2C full insert sequence [Source:UniProtKB/TrEMBL%3BAcc:Q0JBZ0]
OS04G0506100	22.4174	30.4755	14.3594	0.47118	-1.08565	0.0232915	0.88986	Down	1.30444	1.6606	1.5183	0.443604	0.925297	0.629056	protein_coding	Os04g0506100 protein [Source:UniProtKB/TrEMBL%3BAcc:Q0JBW6]	GO:0004672,GO:0005524,GO:0005886,GO:0006468,GO:0016772	protein kinase activity|ATP binding|plasma membrane|protein phosphorylation|transferase activity, transferring phosphorus-containing groups
OS04G0561550	2.61481	0.317071	4.91254	15.4935	3.95359	0.0400532	1	Up	0	0.193075	0	0.206679	1.1314	0.595052	protein_coding
OS04G0571200	19.8352	11.6252	28.0453	2.41246	1.27051	0.0153282	0.766612	Up	0.219889	0.358504	0.130161	0.574872	0.508791	0.646388	protein_coding	cDNA clone:J023097G23%2C full insert sequence [Source:UniProtKB/TrEMBL%3BAcc:B7EJC9]	GO:0004842,GO:0008270,GO:0016567,GO:0046621,GO:0046872	ubiquitin-protein transferase activity|zinc ion binding|protein ubiquitination|negative regulation of organ growth|metal ion binding
OS04G0572800	11.7238	17.2151	6.23246	0.362033	-1.46581	0.0276927	0.931129	Down	2.36973	2.65752	1.43302	0.222179	1.44153	0.430215	protein_coding	OSJNBa0019K04.5 protein [Source:UniProtKB/TrEMBL%3BAcc:Q7XTZ2]	GO:0016021	integral component of membrane
OS04G0584750	3.46217	0.697225	6.22712	8.93129	3.15887	0.030165	0.963911	Up	0	0	0.0574073	0.109809	0.391718	0	protein_coding
OS04G0585700	774.035	1057.73	490.335	0.46357	-1.10914	3.84e-09	3.91e-06	Down	45.7031	45.0341	43.7607	28.133	15.6513	22.3446	protein_coding	OSJNBa0013K16.12 protein%3B Os04g0585700 protein%3B cDNA clone:006-312-B04%2C full insert sequence [Source:UniProtKB/TrEMBL%3BAcc:Q7XP55]
OS04G0586000	367.652	522.265	213.038	0.407911	-1.29367	0.000737709	0.122078	Down	25.0543	22.8616	38.9886	12.8408	10.2081	13.7532	protein_coding	OSJNBa0013K16.15 protein%3B Os04g0586000 protein [Source:UniProtKB/TrEMBL%3BAcc:Q7XP52]
OS04G0586100	176.901	240.379	113.424	0.471853	-1.08359	3.82e-06	0.00193173	Down	23.4727	20.1003	24.8744	12.7126	10.0082	10.9729	protein_coding	OSJNBa0013K16.16 protein%3B Os04g0586100 protein [Source:UniProtKB/TrEMBL%3BAcc:Q7XP51]
OS04G0614500	1.79438	0	3.58876	Inf	Inf	0.0457938	1	Up	0	0	0	0.0517795	0.0540949	0.0355331	protein_coding	Probable gamma-aminobutyrate transaminase 2%2C mitochondrial [Source:UniProtKB/Swiss-Prot%3BAcc:Q7XN12]	GO:0003824,GO:0008152,GO:0008483,GO:0030170	catalytic activity|metabolic process|transaminase activity|pyridoxal phosphate binding	dosa00650,dosa00250	Butanoate metabolism|Alanine, aspartate and glutamate metabolism
OS04G0618700	19.9826	11.1039	28.8614	2.59921	1.37807	0.0191393	0.81547	Up	0.150349	0.316163	0.324415	0.400359	0.852664	0.770222	protein_coding	Os04g0618700 protein [Source:UniProtKB/TrEMBL%3BAcc:Q0JA29]	GO:0004672,GO:0004674,GO:0004675,GO:0004713,GO:0005524,GO:0005768,GO:0005886,GO:0006468,GO:0006898,GO:0007169,GO:0007178,GO:0010359,GO:0016020,GO:0016021,GO:0016045,GO:0016301,GO:0016310,GO:0016772,GO:0042742,GO:0052544	protein kinase activity|protein serine/threonine kinase activity|transmembrane receptor protein serine/threonine kinase activity|protein tyrosine kinase activity|ATP binding|endosome|plasma membrane|protein phosphorylation|receptor-mediated endocytosis|transmembrane receptor protein tyrosine kinase signaling pathway|transmembrane receptor protein serine/threonine kinase signaling pathway|regulati…	dosa04016,dosa04626	MAPK signaling pathway - plant|Plant-pathogen interaction
OS04G0627400	9.51961	14.1723	4.86697	0.343415	-1.54197	0.0396103	1	Down	0.0616862	0.101412	0.24947	0.0785395	0.0206694	0.0404777	protein_coding
OS04G0667300	20.1214	12.7402	27.5027	2.15874	1.11019	0.0316191	0.968203	Up	0.231631	0.276301	0.198291	0.459393	0.555668	0.433919	protein_coding
OS04G0677000	68.9897	6.72235	131.257	19.5255	4.28729	0.00806725	0.574396	Up	0.158238	0.274193	0.16741	6.91252	0.12014	5.94126	protein_coding	Os04g0677000 protein [Source:UniProtKB/TrEMBL%3BAcc:Q0J913]
OS04G0683600	40.1822	26.4922	53.8722	2.03351	1.02397	0.00691006	0.531248	Up	0.652219	0.295702	0.637769	1.34165	1.22254	0.536141	protein_coding	OSJNBa0088H09.1 protein [Source:UniProtKB/TrEMBL%3BAcc:Q7XPV5]	GO:0004672,GO:0005524,GO:0006468,GO:0016772	protein kinase activity|ATP binding|protein phosphorylation|transferase activity, transferring phosphorus-containing groups
OS04G0685300	971.446	550.373	1392.52	2.53013	1.33921	0.00088139	0.140151	Up	19.9802	24.3877	72.7661	89.8425	106.375	109.835	protein_coding	OSJNBa0088H09.15 protein%3B Os04g0685300 protein%3B cDNA clone:001-035-C10%2C full insert sequence%3B cDNA clone:J023054G10%2C full insert sequence [Source:UniProtKB/TrEMBL%3BAcc:Q7XPU1]	GO:0004871,GO:0006952,GO:0007165,GO:0009506,GO:0016021,GO:0046658	signal transducer activity|defense response|signal transduction|plasmodesma|integral component of membrane|anchored component of plasma membrane
OS04G0689700	175.918	112.8	239.036	2.11912	1.08346	0.0456686	1	Up	2.04568	3.52049	2.76067	4.26669	9.03248	4.36646	protein_coding	OSJNBa0039K24.21 protein%3B Os04g0689700 protein%3B cDNA clone:J013051K19%2C full insert sequence [Source:UniProtKB/TrEMBL%3BAcc:Q7XST5]	GO:0000166,GO:0003676	nucleotide binding|nucleic acid binding
OS05G0100100	15.7393	3.36239	28.1161	8.36194	3.06384	0.0475651	1	Up	0.0573508	0.0875425	0.062785	1.26883	0.275639	0.332914	protein_coding	Os05g0100100 protein%3B cDNA%2C clone: J065161O13%2C full insert sequence [Source:UniProtKB/TrEMBL%3BAcc:B7F8T1]
OS05G0122600	17.2987	23.5197	11.0776	0.470992	-1.08623	0.0459488	1	Down	0.400169	0.586954	0.374307	0.260382	0.159992	0.241116	protein_coding	Os05g0122600 protein%3B Putative uncharacterized protein OJ1729_E02.5 [Source:UniProtKB/TrEMBL%3BAcc:Q75L89]
OS05G0146100	22.0361	13.729	30.3433	2.21016	1.14415	0.0204988	0.828097	Up	0.127313	0.211011	0.165751	0.363868	0.34692	0.188649	protein_coding	Os05g0146100 protein%3B Putative uncharacterized protein OSJNBa0077J22.4%3B Putative uncharacterized protein OSJNBb0015A05.10 [Source:UniProtKB/TrEMBL%3BAcc:Q6ASR8]	GO:0003824,GO:0008152	catalytic activity|metabolic process
OS05G0167300	11.1792	17.0914	5.26702	0.308168	-1.69821	0.0128385	0.704092	Down	0.0711858	0.116188	0.106244	0.0147705	0.0856303	0.0076119	protein_coding	Putative uncharacterized protein [Source:UniProtKB/TrEMBL%3BAcc:B9FHR1]
OS05G0172800	9.6482	3.95891	15.3375	3.87417	1.95389	0.0110225	0.661318	Up	0.140235	0.279436	0.0505599	0.431144	0.380799	0.192276	protein_coding
OS05G0177500	42.0288	59.3776	24.6801	0.415646	-1.26657	0.000619781	0.108214	Down	6.45292	7.80036	4.07599	3.8424	1.33855	2.55849	protein_coding	Os05g0177500 protein%3B cDNA%2C clone: J090095M22%2C full insert sequence [Source:UniProtKB/TrEMBL%3BAcc:Q0DKB2]	GO:0008152,GO:0008194,GO:0009813,GO:0016740,GO:0016757,GO:0016758,GO:0043231,GO:0052696	metabolic process|UDP-glycosyltransferase activity|flavonoid biosynthetic process|transferase activity|transferase activity, transferring glycosyl groups|transferase activity, transferring hexosyl groups|intracellular membrane-bounded organelle|flavonoid glucuronidation
OS05G0198200	538.848	729.901	347.795	0.476496	-1.06946	3.12e-08	2.54e-05	Down	42.8911	51.5231	47.916	26.2864	18.3352	28.1554	protein_coding	Glutaredoxin-C7 [Source:UniProtKB/Swiss-Prot%3BAcc:Q0DK35]	GO:0009055,GO:0015035,GO:0045454	electron carrier activity|protein disulfide oxidoreductase activity|cell redox homeostasis
OS05G0201700	5.7587	10.5437	0.973686	0.0923476	-3.43678	0.00225416	0.262951	Down	0.775382	0.243331	0	0	0	0	protein_coding	Putative uncharacterized protein P0708D12.10 [Source:UniProtKB/TrEMBL%3BAcc:Q6L4Q2]
OS05G0202800	2592.62	3912.96	1272.29	0.325148	-1.62083	0.00457571	0.416097	Down	53.5738	110.594	68.759	33.1548	16.4294	20.1198	protein_coding	Metallothionein-like protein 3B [Source:UniProtKB/Swiss-Prot%3BAcc:A3B0Y1]	GO:0005507,GO:0006612,GO:0006833,GO:0006878,GO:0006970,GO:0007389,GO:0008361,GO:0009651,GO:0009750,GO:0009926,GO:0009963,GO:0010015,GO:0010363,GO:0040007,GO:0046686	copper ion binding|protein targeting to membrane|water transport|cellular copper ion homeostasis|response to osmotic stress|pattern specification process|regulation of cell size|response to salt stress|response to fructose|auxin polar transport|positive regulation of flavonoid biosynthetic process|root morphogenesis|regulation of plant-type hypersensitive response|growth|response to cadmium ion
OS05G0208500	316.584	426.56	206.609	0.484361	-1.04585	4.76e-05	0.0147418	Down	22.0504	22.2523	27.1346	7.50002	11.1992	12.5316	protein_coding	Putative uncharacterized protein [Source:UniProtKB/TrEMBL%3BAcc:B9FN23]	GO:0016491,GO:0016706,GO:0046872,GO:0055114	oxidoreductase activity|oxidoreductase activity, acting on paired donors, with incorporation or reduction of molecular oxygen, 2-oxoglutarate as one donor, and incorporation of one atom each of oxygen into both donors|metal ion binding|oxidation-reduction process
OS05G0215700	175.766	114.612	236.92	2.06714	1.04764	0.00989431	0.634283	Up	14.1598	15.0328	13.8867	20.054	39.325	28.1589	protein_coding	Os05g0215700 protein [Source:UniProtKB/TrEMBL%3BAcc:Q0DJX5]
OS05G0220500	20.9452	28.2191	13.6713	0.484471	-1.04552	0.0388905	1	Down	2.39407	2.05873	2.89298	1.4688	0.796195	0.746146	protein_coding	Os05g0220500 protein%3B Putative uncharacterized protein OSJNBb0043H23.2 [Source:UniProtKB/TrEMBL%3BAcc:Q75HU7]
OS05G0233000	72.4362	45.9945	98.8779	2.14978	1.10419	0.00380148	0.373109	Up	0.947401	1.26968	1.71663	1.93425	3.20979	2.95292	protein_coding	Os05g0233000 protein [Source:UniProtKB/TrEMBL%3BAcc:C7J2X8]
OS05G0253200	124.113	78.206	170.019	2.17399	1.12035	0.04904	1	Up	0.441362	0.483359	0.284411	1.24563	0.781979	0.51531	protein_coding
OS05G0264200	6.63633	0.317071	12.9556	40.8602	5.35263	0.0106191	0.654412	Up	0	0.0206725	0	0.241357	0.021252	0.374877	protein_coding	Os05g0264200 protein [Source:UniProtKB/TrEMBL%3BAcc:Q0DJL6]
OS05G0304501	21.9514	13.5478	30.3549	2.24057	1.16387	0.0172093	0.796219	Up	0.33583	0.575706	0.863144	1.00579	1.0368	1.17537	protein_coding
OS05G0326675	93.7563	41.1579	146.355	3.55594	1.83023	1.82e-10	2.35e-07	Up	0.642368	0.587173	0.285202	1.61004	1.55872	1.76492	protein_coding	Putative uncharacterized protein OSJNBa0076A09.5 [Source:UniProtKB/TrEMBL%3BAcc:Q5W690]	GO:0003676,GO:0003677,GO:0003723	nucleic acid binding|DNA binding|RNA binding
OS05G0334750	40.8216	56.695	24.9482	0.440043	-1.18428	0.00169225	0.219939	Down	3.58061	3.18239	2.9508	2.64577	0.56867	1.15992	protein_coding	CBL-interacting protein kinase 22 [Source:UniProtKB/Swiss-Prot%3BAcc:Q5KQF5]	GO:0004672,GO:0005524,GO:0006468,GO:0007165	protein kinase activity|ATP binding|protein phosphorylation|signal transduction
OS05G0425600	20.0792	1.01186	39.1466	38.6877	5.2738	0.000674318	0.114964	Up	0.0544394	0.0267717	0	1.26395	0.163344	0.964748	protein_coding	Os05g0425600 protein%3B Unknow protein [Source:UniProtKB/TrEMBL%3BAcc:Q60EC5]
OS05G0425650	4.85653	0	9.71306	Inf	Inf	0.00401266	0.389804	Up	0	0	0	0.89147	0.197296	2.09508	protein_coding
OS05G0434600	28.2385	14.5844	41.8927	2.87243	1.52227	0.0415942	1	Up	0.736529	1.24614	0.717629	2.97557	1.89627	0.357046	protein_coding
OS05G0436900	14.1042	6.02269	22.1857	3.68369	1.88115	0.00270952	0.297764	Up	0.0976784	0.168519	0.108922	0.451294	0.419731	0.561167	protein_coding	Os05g0436900 protein [Source:UniProtKB/TrEMBL%3BAcc:Q0DHW0]	GO:0005886,GO:0008270,GO:0016021,GO:0019706,GO:0046872	plasma membrane|zinc ion binding|integral component of membrane|protein-cysteine S-palmitoyltransferase activity|metal ion binding
OS05G0474800	286.017	157.833	414.2	2.62428	1.39192	0.011186	0.663018	Up	1.61165	3.23776	11.6657	12.1589	17.1967	14.5885	protein_coding	Os05g0474800 protein%3B WRKY transcription factor 70 [Source:UniProtKB/TrEMBL%3BAcc:Q65WW1]	GO:0003700,GO:0006355,GO:0043565	transcription factor activity, sequence-specific DNA binding|regulation of transcription, DNA-templated|sequence-specific DNA binding	dosa04016,dosa04626	MAPK signaling pathway - plant|Plant-pathogen interaction
OS05G0477800	39.2275	17.18	61.2751	3.56666	1.83457	0.0212201	0.841793	Up	0.688653	0.926486	0.755354	1.17048	2.91051	4.29051	protein_coding
OS05G0507400	41.3568	55.3345	27.379	0.494792	-1.01511	0.00621528	0.505444	Down	14.9301	12.7581	7.7991	7.04006	5.00962	5.70146	protein_coding	Os05g0507400 protein%3B cDNA clone:002-132-E05%2C full insert sequence [Source:UniProtKB/TrEMBL%3BAcc:Q0DGW7]
OS05G0517200	580.651	288.939	872.362	3.01919	1.59416	0.0247527	0.908084	Up	2.35128	2.94743	3.27288	4.48937	13.727	7.8048	protein_coding	Os05g0517200 protein%3B Putative trehalose-6-phosphate synthase%3B cDNA clone:J013110H22%2C full insert sequence [Source:UniProtKB/TrEMBL%3BAcc:Q75II7]	GO:0003824,GO:0005992,GO:0008152	catalytic activity|trehalose biosynthetic process|metabolic process	dosa00500	Starch and sucrose metabolism
OS05G0524100	222.105	96.0951	348.115	3.62261	1.85703	0.000342588	0.0706601	Up	2.68356	2.04114	8.59223	10.9096	16.9412	14.0476	protein_coding	Os05g0524100 protein [Source:UniProtKB/TrEMBL%3BAcc:Q0DGM2]
OS05G0575000	30.7412	42.8703	18.612	0.434146	-1.20375	0.0393345	1	Down	2.64455	5.57105	6.53895	2.25592	2.44513	2.76779	protein_coding	Os05g0575000 protein%3B Putative uncharacterized protein OJ1268_B08.13 [Source:UniProtKB/TrEMBL%3BAcc:Q6F369]	GO:0003674,GO:0008150	molecular_function|biological_process
OS05G0580200	9.04244	0	18.0849	Inf	Inf	0.00341474	0.349618	Up	0	0	0	0	2.91842	3.77667	protein_coding	Os05g0580100 protein%3B Putative uncharacterized protein OSJNBa0017N18.14%3B cDNA clone:002-169-D03%2C full insert sequence [Source:UniProtKB/TrEMBL%3BAcc:Q688T7]
OS05G0581900	18.1736	24.5776	11.7695	0.478872	-1.06229	0.0452676	1	Down	1.31246	0.922379	0.638227	0.443972	0.420355	0.433792	protein_coding	Os05g0581900 protein%3B Putative uncharacterized protein OJ1651_G11.6 [Source:UniProtKB/TrEMBL%3BAcc:Q6L5D9]
OS05G0591550	20.0678	12.0078	28.1277	2.34246	1.22803	0.0182715	0.804741	Up	0.77791	0.474868	0.200625	0.299169	1.00404	1.1988	protein_coding
OS06G0119900	45.1228	62.1891	28.0565	0.451147	-1.14833	0.0014209	0.193126	Down	5.1677	5.01483	4.96112	2.76272	2.47825	2.03901	protein_coding	Os06g0119900 protein%3B Putative uncharacterized protein OSJNBa0062J13.48%3B Putative uncharacterized protein P0660D08.17 [Source:UniProtKB/TrEMBL%3BAcc:Q5VPQ4]	GO:0016021	integral component of membrane
OS06G0176200	88.4252	18.0378	158.813	8.80446	3.13823	3.32e-09	3.5e-06	Up	0.391531	0.633076	0.309723	2.79257	5.21797	4.77584	protein_coding	Beta 1%2C3-glycosyltransferase-like protein II%3B Os06g0176200 protein [Source:UniProtKB/TrEMBL%3BAcc:Q9LDB7]	GO:0005794,GO:0006486,GO:0008378,GO:0016020,GO:0016021,GO:0016740,GO:0016757	Golgi apparatus|protein glycosylation|galactosyltransferase activity|membrane|integral component of membrane|transferase activity|transferase activity, transferring glycosyl groups
OS06G0200700	13.4597	7.10494	19.8146	2.78884	1.47967	0.0173211	0.796219	Up	0.0614467	0.0723313	0.0820267	0.259237	0.087179	0.219131	protein_coding	Os06g0200700 protein [Source:UniProtKB/TrEMBL%3BAcc:Q0DDT7]
OS06G0200800	25.868	7.82519	43.9109	5.61148	2.48838	0.0258082	0.915506	Up	0.543861	0.318295	0.400384	2.56647	3.73733	0.651177	protein_coding	cDNA clone:002-181-B05%2C full insert sequence [Source:UniProtKB/TrEMBL%3BAcc:B7F3K6]
OS06G0203200	45.4914	27.7171	63.2657	2.28255	1.19064	0.0209729	0.836068	Up	1.18002	0.497659	0.514086	1.18523	1.90834	1.88226	protein_coding	Putative flavin-containing monooxygenase 1 [Source:UniProtKB/TrEMBL%3BAcc:Q69SQ3]	GO:0004497,GO:0004499,GO:0016491,GO:0050660,GO:0050661,GO:0055114	monooxygenase activity|N,N-dimethylaniline monooxygenase activity|oxidoreductase activity|flavin adenine dinucleotide binding|NADP binding|oxidation-reduction process
OS06G0229800	17.3339	25.2345	9.43329	0.373826	-1.41956	0.0111237	0.663018	Down	0.594875	0.396964	0.682777	0.265051	0.129409	0.219298	protein_coding	Soluble starch synthase 2-3%2C chloroplastic/amyloplastic [Source:UniProtKB/Swiss-Prot%3BAcc:Q0DDE3]	GO:0004373,GO:0009011,GO:0009058,GO:0009250,GO:0009501,GO:0009507,GO:0019252,GO:0033201	glycogen (starch) synthase activity|starch synthase activity|biosynthetic process|glucan biosynthetic process|amyloplast|chloroplast|starch biosynthetic process|alpha-1,4-glucan synthase activity	dosa00500	Starch and sucrose metabolism
OS06G0239100	97.5437	54.4531	140.634	2.58267	1.36886	0.0325414	0.975029	Up	1.61972	2.52901	7.77793	6.20715	14.246	12.8418	protein_coding	Os06g0239100 protein%3B Putative metalloproteinase [Source:UniProtKB/TrEMBL%3BAcc:Q67VB1]	GO:0004222,GO:0006508,GO:0008233,GO:0008237,GO:0008270,GO:0016787,GO:0031012,GO:0046872	metalloendopeptidase activity|proteolysis|peptidase activity|metallopeptidase activity|zinc ion binding|hydrolase activity|extracellular matrix|metal ion binding
OS06G0239500	22.7037	33.4249	11.9824	0.358487	-1.48001	0.00377258	0.372844	Down	0.998082	1.9307	1.38157	0.851927	0.179186	0.416793	protein_coding	Os06g0239500 protein%3B Putative oligopeptide transporter%3B cDNA clone:J013001A13%2C full insert sequence [Source:UniProtKB/TrEMBL%3BAcc:Q67VA7]	GO:0005215,GO:0006810,GO:0009624,GO:0016020,GO:0016021	transporter activity|transport|response to nematode|membrane|integral component of membrane
OS06G0247000	15.7682	8.98025	22.5562	2.51175	1.3287	0.0185879	0.808972	Up	0.653733	0.311497	1.14536	1.49977	2.15054	2.20981	protein_coding	Os06g0247000 protein [Source:UniProtKB/TrEMBL%3BAcc:Q0DD76]	GO:0000271,GO:0005794,GO:0016757	polysaccharide biosynthetic process|Golgi apparatus|transferase activity, transferring glycosyl groups
OS06G0268500	82.6199	12.4461	152.794	12.2764	3.61781	4.27e-21	8.69e-18	Up	0.119711	0.107263	0.0754526	1.12365	0.938489	1.30579	protein_coding	Putative uncharacterized protein [Source:UniProtKB/TrEMBL%3BAcc:A3BAI8]	GO:0006952,GO:0043531	defense response|ADP binding
OS06G0269300	158.597	218.417	98.777	0.45224	-1.14484	2.03e-06	0.00118106	Down	4.21636	3.97558	3.7604	2.72113	1.25123	1.95541	protein_coding	NHL repeat-containing protein-like%3B Os06g0269300 protein%3B cDNA clone:J033117I22%2C full insert sequence [Source:UniProtKB/TrEMBL%3BAcc:Q5Z6M0]	GO:0016021	integral component of membrane
OS06G0312900	11.1712	16.1559	6.18638	0.382917	-1.3849	0.0425331	1	Down	0.896939	0.864748	0.70377	0.580625	0	0.577662	protein_coding	Os06g0312900 protein%3B Putative uncharacterized protein OSJNBb0006M19.18 [Source:UniProtKB/TrEMBL%3BAcc:Q5Z525]
OS06G0551800	39.8075	22.3024	57.3126	2.5698	1.36166	0.000785678	0.127061	Up	0.28167	0.201504	0.163765	0.434796	0.715151	0.498431	protein_coding
OS06G0559400	133.727	55.7263	211.727	3.79941	1.92578	0.00276341	0.302519	Up	2.89925	3.24535	0.820413	7.66127	13.7753	6.45031	protein_coding	Os06g0559400 protein%3B Putative uncharacterized protein OSJNBa0090E14.34%3B Putative uncharacterized protein P0528E12.5%3B cDNA clone:J013142H05%2C full insert sequence%3B cDNA clone:J013162F05%2C full insert sequence [Source:UniProtKB/TrEMBL%3BAcc:Q5Z7F9]
OS06G0564700	35.1494	10.4467	59.852	5.72926	2.51835	0.0240503	0.899533	Up	0.0415342	0.183786	0.373831	0.573021	1.8156	0.586934	protein_coding	Os06g0564700 protein%3B Putative cysteine synthase%3B cDNA clone:J023050D23%2C full insert sequence [Source:UniProtKB/TrEMBL%3BAcc:Q5Z6A9]	GO:0004124,GO:0006535,GO:0030170	cysteine synthase activity|cysteine biosynthetic process from serine|pyridoxal phosphate binding	dosa01200,dosa01230,dosa00920,dosa00270	Carbon metabolism|Biosynthesis of amino acids|Sulfur metabolism|Cysteine and methionine metabolism
OS06G0579100	1470.08	768.056	2172.1	2.82805	1.49981	1.54e-16	2.92e-13	Up	7.6111	10.4969	13.5508	23.8108	25.4491	30.0319	protein_coding	Os06g0579100 protein [Source:UniProtKB/TrEMBL%3BAcc:C7J3I2]	GO:0016021	integral component of membrane
OS06G0696600	1393.44	760.491	2026.39	2.66459	1.41391	0.0431024	1	Up	53.3446	60.6235	32.2161	60.4816	204.693	132.111	protein_coding	Os06g0696600 protein%3B Putative xyloglucan endotransglycosylase%3B cDNA clone:001-205-B05%2C full insert sequence [Source:UniProtKB/TrEMBL%3BAcc:Q5Z6H0]	GO:0004553,GO:0005618,GO:0005975,GO:0006073,GO:0010411,GO:0016762,GO:0042545,GO:0042546,GO:0048046,GO:0080022,GO:0080039	hydrolase activity, hydrolyzing O-glycosyl compounds|cell wall|carbohydrate metabolic process|cellular glucan metabolic process|xyloglucan metabolic process|xyloglucan:xyloglucosyl transferase activity|cell wall modification|cell wall biogenesis|apoplast|primary root development|xyloglucan endotransglucosylase activity
OS06G0698748	83.7948	45.0318	122.558	2.72158	1.44445	0.0255527	0.913265	Up	1.86415	2.48852	0.741952	4.25856	7.02562	3.13059	protein_coding	Putative uncharacterized protein P0545E05.31-2%3B cDNA clone:001-202-G04%2C full insert sequence [Source:UniProtKB/TrEMBL%3BAcc:Q5Z4U7]
OS06G0707733	13.9027	6.64954	21.1558	3.18154	1.66973	0.00773119	0.569217	Up	0.043262	0.054655	0.00670389	0.128195	0.0930794	0.133033	protein_coding		GO:0043531	ADP binding
OS06G0708400	19.3731	10.9656	27.7806	2.53343	1.34109	0.0116576	0.67304	Up	0.277801	0.549691	0.197408	1.29512	1.91015	1.10787	protein_coding	Peptidyl-prolyl cis-trans isomerase [Source:UniProtKB/TrEMBL%3BAcc:Q5Z9I0]	GO:0000413,GO:0003755,GO:0005768,GO:0005771,GO:0005783,GO:0005794,GO:0005795,GO:0005802,GO:0005829,GO:0005886,GO:0006457,GO:0009507,GO:0016853,GO:0048364	protein peptidyl-prolyl isomerization|peptidyl-prolyl cis-trans isomerase activity|endosome|multivesicular body|endoplasmic reticulum|Golgi apparatus|Golgi stack|trans-Golgi network|cytosol|plasma membrane|protein folding|chloroplast|isomerase activity|root development
OS06G0730200	485.192	304.095	666.289	2.19105	1.13162	0.0268269	0.925172	Up	7.39483	5.98502	8.22403	8.29615	22.6789	19.1936	protein_coding	Os06g0730200 protein [Source:UniProtKB/TrEMBL%3BAcc:C7J4A6]
OS07G0110000	1958.88	732.718	3185.04	4.34689	2.11998	0.000260741	0.0570881	Up	6.00082	6.56167	4.86856	32.8552	20.7723	17.8024	protein_coding	Os07g0110000 protein [Source:UniProtKB/TrEMBL%3BAcc:Q0D931]	GO:0016021	integral component of membrane
OS07G0113300	17.2346	23.3378	11.1314	0.47697	-1.06803	0.0461652	1	Down	1.68607	2.69452	1.97248	0.831395	1.07429	1.31686	protein_coding	Putative uncharacterized protein OJ1118_G09.123%3B Putative uncharacterized protein OJ1513_F02.116 [Source:UniProtKB/TrEMBL%3BAcc:Q8GSA2]
OS07G0114000	196.942	121.095	272.789	2.25269	1.17165	0.038765	1	Up	7.3177	6.75884	16.7974	15.3148	32.9456	24.3144	protein_coding	Probable protein phosphatase 2C 61 [Source:UniProtKB/Swiss-Prot%3BAcc:Q7XHN8]	GO:0003824,GO:0004722,GO:0006470,GO:0043169	catalytic activity|protein serine/threonine phosphatase activity|protein dephosphorylation|cation binding
OS07G0115500	416.081	579.68	252.482	0.435554	-1.19908	2.34e-09	2.56e-06	Down	71.6727	69.3687	57.7152	42.5573	26.7649	31.59	protein_coding	Os07g0115500 protein%3B Putative uncharacterized protein OJ1138_B05.116 [Source:UniProtKB/TrEMBL%3BAcc:Q8H2N9]
OS07G0116600	135.551	196.783	74.32	0.377676	-1.40478	2.51e-08	2.16e-05	Down	16.5657	18.9973	16.1484	8.49366	3.80531	5.61492	protein_coding	Acetyltransferase-like protein [Source:UniProtKB/TrEMBL%3BAcc:Q7EYF5]	GO:0004596,GO:0006474,GO:0008080,GO:0009640,GO:0009723,GO:0009734,GO:0009826,GO:0016740,GO:0031248	peptide alpha-N-acetyltransferase activity|N-terminal protein amino acid acetylation|N-acetyltransferase activity|photomorphogenesis|response to ethylene|auxin-activated signaling pathway|unidimensional cell growth|transferase activity|protein acetyltransferase complex
OS07G0122000	1810.82	73.7809	3547.86	48.0864	5.58756	5.87e-05	0.0174138	Up	0.519274	0.381011	1.92486	64.507	9.38005	57.7706	protein_coding	Os07g0122000 protein%3B Putative uncharacterized protein OSJNBa0057M23.118%3B Putative uncharacterized protein P0022B05.146%3B cDNA clone:J033095G03%2C full insert sequence [Source:UniProtKB/TrEMBL%3BAcc:Q7XIE4]
OS07G0123450	22.1964	29.7923	14.6004	0.490073	-1.02893	0.0363711	0.991922	Down	1.34866	1.02407	1.27394	0.727935	0.152633	0.4532	protein_coding	Os07g0123400 protein [Source:UniProtKB/TrEMBL%3BAcc:C7J4M2]
OS07G0136800	168.277	90.6801	245.873	2.71144	1.43906	0.00378796	0.373069	Up	0.410327	0.767284	0.298101	1.19736	1.91363	1.01991	protein_coding	Os07g0136800 protein [Source:UniProtKB/TrEMBL%3BAcc:C7J522]	GO:0003677,GO:0005506,GO:0016705,GO:0020037,GO:0055114	DNA binding|iron ion binding|oxidoreductase activity, acting on paired donors, with incorporation or reduction of molecular oxygen|heme binding|oxidation-reduction process
OS07G0136866	41.2687	20.9504	61.587	2.93966	1.55565	0.000418557	0.083589	Up	0	0	0	0	0	0	protein_coding
OS07G0137000	182.992	90.2595	275.725	3.0548	1.61108	0.000145858	0.0364172	Up	0.630148	0.891386	0.489222	1.42273	2.85536	2.08911	protein_coding	Os07g0137000 protein [Source:UniProtKB/TrEMBL%3BAcc:Q0D8Q7]	GO:0003677	DNA binding
OS07G0154100	103.954	42.7251	165.183	3.86618	1.95091	0.0388612	1	Up	1.22761	1.58477	3.95585	3.05628	9.59096	14.8687	protein_coding	9-cis-epoxycarotenoid dioxygenase 4%3B Putative viviparous-14 protein%3B cDNA clone:002-173-D12%2C full insert sequence [Source:UniProtKB/TrEMBL%3BAcc:Q69NX5]	GO:0016702,GO:0051213,GO:0055114	oxidoreductase activity, acting on single donors with incorporation of molecular oxygen, incorporation of two atoms of oxygen|dioxygenase activity|oxidation-reduction process	dosa00906	Carotenoid biosynthesis
OS07G0162450	10.302	0	20.604	Inf	Inf	0.0157927	0.771284	Up	0	0	0	2.18787	0	0.816879	protein_coding	Os07g0162450 protein%3B Putative uncharacterized protein OJ1714_H10.151%3B Putative uncharacterized protein P0428D12.104 [Source:UniProtKB/TrEMBL%3BAcc:Q7XIL6]
OS07G0175600	32.1454	43.9962	20.2946	0.46128	-1.11628	0.0420728	1	Down	4.69319	6.13135	8.51025	1.15728	2.24216	5.03263	protein_coding	Os07g0175600 protein%3B Protease inhibitor-like protein%3B cDNA clone:001-121-C08%2C full insert sequence%3B cDNA clone:J033042C03%2C full insert sequence [Source:UniProtKB/TrEMBL%3BAcc:Q8H567]	GO:0006508,GO:0006869,GO:0008233,GO:0008289	proteolysis|lipid transport|peptidase activity|lipid binding
OS07G0191625	5.22337	8.49696	1.94978	0.229469	-2.12363	0.0468936	1	Down	0.23516	0.137248	0.138269	0	0	0.186896	protein_coding
OS07G0194100	22.8593	31.3728	14.3458	0.45727	-1.12888	0.0187423	0.811968	Down	0.785494	0.711157	0.727166	0.34247	0.307704	0.156227	protein_coding	Os07g0194100 protein%3B Putative SnRK1b protein kinase%3B cDNA clone:001-114-D08%2C full insert sequence [Source:UniProtKB/TrEMBL%3BAcc:Q6ZL03]	GO:0004672,GO:0004674,GO:0005524,GO:0005737,GO:0006468,GO:0016301,GO:0016310,GO:0016772,GO:0035556	protein kinase activity|protein serine/threonine kinase activity|ATP binding|cytoplasm|protein phosphorylation|kinase activity|phosphorylation|transferase activity, transferring phosphorus-containing groups|intracellular signal transduction
OS07G0205500	14.4369	7.38682	21.487	2.90883	1.54044	0.011227	0.663018	Up	0.124351	0.196716	0.148384	0.509501	0.353697	0.611654	protein_coding	Os07g0205500 protein%3B Putative DD1A protein%3B cDNA clone:J033129H24%2C full insert sequence [Source:UniProtKB/TrEMBL%3BAcc:Q6ZIY2]
OS07G0250900	36.3396	22.3308	50.3484	2.25466	1.17291	0.0033489	0.346755	Up	0.820465	3.34363	2.08524	4.25967	5.63097	5.70132	protein_coding	Os07g0250900 protein%3B Putative uncharacterized protein OSJNBb0056I06.113%3B Putative uncharacterized protein P0021G06.129%3B cDNA clone:002-135-A06%2C full insert sequence [Source:UniProtKB/TrEMBL%3BAcc:Q8GRV7]	GO:0004871,GO:0006952,GO:0007165,GO:0009506,GO:0016021,GO:0046658	signal transducer activity|defense response|signal transduction|plasmodesma|integral component of membrane|anchored component of plasma membrane
OS07G0418500	30.1513	16.0524	44.2502	2.7566	1.46289	0.0297616	0.95718	Up	0.256312	0.225593	0.527472	0.440951	1.19085	1.30219	protein_coding	Os07g0418500 protein%3B Putative cytochrome P450%3B cDNA clone:J013166A09%2C full insert sequence [Source:UniProtKB/TrEMBL%3BAcc:Q8LHV0]	GO:0004497,GO:0005506,GO:0009055,GO:0016491,GO:0016705,GO:0020037,GO:0046872,GO:0055114	monooxygenase activity|iron ion binding|electron carrier activity|oxidoreductase activity|oxidoreductase activity, acting on paired donors, with incorporation or reduction of molecular oxygen|heme binding|metal ion binding|oxidation-reduction process
OS07G0437000	23.9761	35.2302	12.7219	0.361108	-1.4695	0.0124814	0.692511	Down	0.935195	1.5485	0.507253	0.437355	0.3947	0.360782	protein_coding	Os07g0437000 protein%3B Putative dimethylaniline monooxygenase [Source:UniProtKB/TrEMBL%3BAcc:Q7XHL8]	GO:0004497,GO:0004499,GO:0009742,GO:0009851,GO:0016491,GO:0050660,GO:0050661,GO:0055114	monooxygenase activity|N,N-dimethylaniline monooxygenase activity|brassinosteroid mediated signaling pathway|auxin biosynthetic process|oxidoreductase activity|flavin adenine dinucleotide binding|NADP binding|oxidation-reduction process	dosa00380	Tryptophan metabolism
OS07G0457200	4.57768	0.697225	8.45814	12.1311	3.60064	0.00528985	0.453509	Up	0.0165894	0	0.0181414	0.139476	0.081279	0.191791	protein_coding
OS07G0486000	38.9277	21.8361	56.0194	2.56545	1.35921	0.00412541	0.395755	Up	0.0813735	0.123071	0.0654487	0.37166	0.154653	0.114549	protein_coding	Os07g0486000 protein [Source:UniProtKB/TrEMBL%3BAcc:C7J4K5]	GO:0000794,GO:0000911,GO:0005524,GO:0006298,GO:0006302,GO:0006312,GO:0007062,GO:0007067,GO:0007129,GO:0009506,GO:0010332,GO:0010564,GO:0010777,GO:0030983,GO:0032204,GO:0032504,GO:0042138,GO:0043073,GO:0043247,GO:0045143	condensed nuclear chromosome|cytokinesis by cell plate formation|ATP binding|mismatch repair|double-strand break repair|mitotic recombination|sister chromatid cohesion|mitotic nuclear division|synapsis|plasmodesma|response to gamma radiation|regulation of cell cycle process|meiotic mismatch repair involved in reciprocal meiotic recombination|mismatched DNA binding|regulation of telomere maintenan…
OS07G0511400	9.2306	0	18.4612	Inf	Inf	3.24e-05	0.0109827	Up	0	0	0	4.56694	1.01251	2.97235	protein_coding
OS07G0524300	4.11544	7.57772	0.653165	0.0861954	-3.53624	0.00885217	0.601851	Down	1.0506	2.17307	0.913795	0.236341	0.213258	0	protein_coding
OS07G0527000	6.02814	2.28501	9.77126	4.27624	2.09634	0.0358243	0.988772	Up	0	0	0.0399806	0.11816	0.237468	0.0790667	protein_coding	Putative uncharacterized protein [Source:UniProtKB/TrEMBL%3BAcc:A3BKI4]	GO:0016020,GO:0016021,GO:0022857	membrane|integral component of membrane|transmembrane transporter activity
OS07G0538000	4.44289	0.317071	8.56871	27.0246	4.7562	0.0189392	0.81547	Up	0	0.0254653	0	0.0259618	0.378847	0.256537	protein_coding	Os07g0538000 protein%3B Putative beta-1%2C3-glucanase [Source:UniProtKB/TrEMBL%3BAcc:Q6YVW0]	GO:0003824,GO:0004553,GO:0005975,GO:0016787	catalytic activity|hydrolase activity, hydrolyzing O-glycosyl compounds|carbohydrate metabolic process|hydrolase activity
OS07G0539300	294.31	190.986	397.634	2.082	1.05797	0.00585358	0.487102	Up	3.83418	4.85175	3.88034	6.90894	12.2064	7.3533	protein_coding	Putative beta-1%2C3-glucanase [Source:UniProtKB/TrEMBL%3BAcc:Q6YVU3]	GO:0003824,GO:0004553,GO:0005975,GO:0016787	catalytic activity|hydrolase activity, hydrolyzing O-glycosyl compounds|carbohydrate metabolic process|hydrolase activity
OS07G0551300	3295.79	1927.92	4663.66	2.41901	1.27442	0.0425564	1	Up	16.0879	14.4723	27.4649	19.511	61.0978	60.4948	protein_coding	Serine/threonine-protein kinase [Source:UniProtKB/TrEMBL%3BAcc:Q7EZ32]	GO:0000166,GO:0004672,GO:0004674,GO:0005524,GO:0005886,GO:0006468,GO:0006952,GO:0009506,GO:0016021,GO:0016301,GO:0016310,GO:0016740,GO:0016772,GO:0048544	nucleotide binding|protein kinase activity|protein serine/threonine kinase activity|ATP binding|plasma membrane|protein phosphorylation|defense response|plasmodesma|integral component of membrane|kinase activity|phosphorylation|transferase activity|transferase activity, transferring phosphorus-containing groups|recognition of pollen
OS07G0560100	17.7875	10.3723	25.2028	2.42983	1.28085	0.0159985	0.77484	Up	2.80877	0.997773	0	1.32037	3.75369	3.86241	protein_coding
OS07G0560400	4.76878	0	9.53757	Inf	Inf	0.0276224	0.931129	Up	0	0	0	0.111344	0.184366	0	protein_coding
OS07G0564100	11.2846	16.3124	6.2567	0.383555	-1.3825	0.0419401	1	Down	1.8103	1.09553	0.936069	0.188235	0.841736	0.267873	protein_coding	Os07g0564100 protein%3B Putative betanidin 6-O-glucosyltransferase [Source:UniProtKB/TrEMBL%3BAcc:Q8GS49]	GO:0008152,GO:0009813,GO:0016740,GO:0016757,GO:0016758,GO:0043231,GO:0052696,GO:0080043,GO:0080044	metabolic process|flavonoid biosynthetic process|transferase activity|transferase activity, transferring glycosyl groups|transferase activity, transferring hexosyl groups|intracellular membrane-bounded organelle|flavonoid glucuronidation|quercetin 3-O-glucosyltransferase activity|quercetin 7-O-glucosyltransferase activity
OS07G0587250	1.94058	0	3.88116	Inf	Inf	0.0339086	0.982832	Up	0	0	0	0	0	0	protein_coding
OS07G0598000	12.4053	17.605	7.20563	0.409294	-1.28879	0.0462559	1	Down	0.584435	1.0178	1.44938	0.0668034	0.382898	0.698123	protein_coding	Os07g0598000 protein%3B Putative NADPH HC toxin reductase%3B cDNA clone:001-207-B06%2C full insert sequence%3B cDNA clone:J023068M23%2C full insert sequence [Source:UniProtKB/TrEMBL%3BAcc:Q6ZJE8]	GO:0003824,GO:0044237,GO:0050662	catalytic activity|cellular metabolic process|coenzyme binding
OS07G0599600	8.57467	13.8758	3.27357	0.23592	-2.08363	0.0100264	0.641308	Down	1.72781	1.36461	1.0208	0.121204	0.325653	0.687963	protein_coding	Early nodulin 75-like protein%3B Os07g0599600 protein%3B cDNA clone:001-204-H12%2C full insert sequence%3B cDNA clone:001-208-G11%2C full insert sequence [Source:UniProtKB/TrEMBL%3BAcc:Q8H5A3]	GO:0007275	multicellular organism development
OS07G0599700	5.31651	8.65754	1.97549	0.228182	-2.13175	0.0392375	1	Down	0.604324	1.19557	0.916303	0	0.354639	0.363963	protein_coding	Os07g0599700 protein%3B Proline-rich protein family-like protein%3B cDNA clone:J013040D08%2C full insert sequence [Source:UniProtKB/TrEMBL%3BAcc:Q8H5A1]	GO:0007275	multicellular organism development
OS07G0599900	10.6248	15.665	5.58462	0.356504	-1.48801	0.0351565	0.988772	Down	2.17094	2.04204	2.96106	0.521124	0.977783	0.337343	protein_coding	Os07g0599900 protein%3B Putative uncharacterized protein OJ1634_B10.117%3B cDNA clone:001-105-G06%2C full insert sequence [Source:UniProtKB/TrEMBL%3BAcc:Q8H599]	GO:0007275	multicellular organism development
OS07G0642200	81.9519	43.3626	120.541	2.77984	1.475	0.0483239	1	Up	0.84893	4.16654	5.47425	4.58874	10.6275	15.7901	protein_coding	Lipase-like protein%3B Os07g0642200 protein%3B cDNA clone:001-015-G02%2C full insert sequence [Source:UniProtKB/TrEMBL%3BAcc:Q8GS76]	GO:0006629,GO:0016787,GO:0016788	lipid metabolic process|hydrolase activity|hydrolase activity, acting on ester bonds
OS07G0680600	2331	1181.92	3480.08	2.94444	1.55799	0.00117852	0.172022	Up	13.3774	18.2662	60.722	83.11	101.523	125.693	protein_coding	Os07g0680600 protein%3B Putative uncharacterized protein OJ1205_F02.25%3B Putative uncharacterized protein OSJNBa0008J01.12%3B cDNA clone:J033117L20%2C full insert sequence [Source:UniProtKB/TrEMBL%3BAcc:Q7XHX2]
OS07G0682500	13.3688	6.05545	20.6821	3.41544	1.77207	0.0128675	0.704322	Up	0.138215	0.190712	0.161811	0.334512	0.873137	0.527909	protein_coding
OS07G0687900	161.325	101.636	221.014	2.17456	1.12072	0.0200332	0.818929	Up	4.11943	3.8771	3.57806	6.02144	13.8857	10.4429	protein_coding	Os07g0687900 protein%3B WSI76 protein induced by water stress%3B cDNA clone:002-121-E05%2C full insert sequence%3B cDNA clone:J013033D21%2C full insert sequence [Source:UniProtKB/TrEMBL%3BAcc:Q40710]	GO:0006012,GO:0009408,GO:0009409,GO:0009414,GO:0009644,GO:0016757,GO:0042542,GO:0047216	galactose metabolic process|response to heat|response to cold|response to water deprivation|response to high light intensity|transferase activity, transferring glycosyl groups|response to hydrogen peroxide|inositol 3-alpha-galactosyltransferase activity	dosa00052	Galactose metabolism
OS08G0113000	33.8961	48.5779	19.2143	0.395535	-1.33812	0.00110566	0.164464	Down	2.66614	2.51739	3.58919	1.496	1.1107	1.01738	protein_coding	Os08g0113000 protein%3B Putative peroxidase 47 [Source:UniProtKB/TrEMBL%3BAcc:Q6ZCC2]	GO:0004601,GO:0005576,GO:0006598,GO:0006979,GO:0009698,GO:0010167,GO:0015706,GO:0016491,GO:0020037,GO:0042398,GO:0042744,GO:0046872,GO:0055114	peroxidase activity|extracellular region|polyamine catabolic process|response to oxidative stress|phenylpropanoid metabolic process|response to nitrate|nitrate transport|oxidoreductase activity|heme binding|cellular modified amino acid biosynthetic process|hydrogen peroxide catabolic process|metal ion binding|oxidation-reduction process	dosa00940	Phenylpropanoid biosynthesis
OS08G0137800	61.3807	29.5239	93.2375	3.15804	1.65903	0.0229959	0.885019	Up	0.924087	2.25378	4.1014	4.10085	11.9248	7.23195	protein_coding	Os08g0137800 protein%3B cDNA clone:001-110-D06%2C full insert sequence [Source:UniProtKB/TrEMBL%3BAcc:Q0J844]	GO:0005507,GO:0009055,GO:0016021,GO:0046658	copper ion binding|electron carrier activity|integral component of membrane|anchored component of plasma membrane
OS08G0137900	22.0241	5.10424	38.944	7.62973	2.93163	7.77e-08	5.98e-05	Up	0.507314	0.398669	0.588559	3.08198	4.82816	3.94302	protein_coding	Os08g0137900 protein%3B Putative blue copper binding protein [Source:UniProtKB/TrEMBL%3BAcc:Q6ZJW2]	GO:0005507,GO:0009055,GO:0016021,GO:0046658	copper ion binding|electron carrier activity|integral component of membrane|anchored component of plasma membrane
OS08G0170700	28.3282	15.9444	40.712	2.55337	1.3524	0.0316343	0.968203	Up	0.124368	0.122085	0.16757	0.436624	0.305967	0.157613	protein_coding	Putative RGH1A [Source:UniProtKB/TrEMBL%3BAcc:Q6YYL3]	GO:0006952,GO:0043531	defense response|ADP binding
OS08G0173600	105.421	62.673	148.169	2.36416	1.24133	0.0151951	0.766612	Up	1.88346	4.84799	4.55607	3.40472	7.29994	7.4059	protein_coding	Os08g0173600 protein [Source:UniProtKB/TrEMBL%3BAcc:Q0J7P8]
OS08G0205800	622.266	346.498	898.034	2.59174	1.37392	0.0413581	1	Up	5.53553	4.76159	14.9653	11.8404	25.5483	17.3023	protein_coding
OS08G0211750	9.22238	0	18.4448	Inf	Inf	0.0158764	0.772459	Up	0	0	0	1.24508	0.532981	0	protein_coding
OS08G0229601	31.8587	19.7222	43.9952	2.23075	1.15753	0.00486836	0.435458	Up	0.454292	0.372943	0.598873	1.25315	1.00762	1.13926	protein_coding	Putative uncharacterized protein [Source:UniProtKB/TrEMBL%3BAcc:A3BQV4]	GO:0000145,GO:0006887	exocyst|exocytosis
OS08G0246700	106.137	44.2032	168.071	3.80224	1.92685	0.0183998	0.808117	Up	6.27443	11.3001	5.23466	36.7453	31.2215	8.40799	protein_coding
OS08G0246800	604.817	241.054	968.58	4.01811	2.00652	0.017349	0.796219	Up	16.4673	10.7446	15.7984	44.7791	31.6143	13.9154	protein_coding	Os08g0246800 protein [Source:UniProtKB/TrEMBL%3BAcc:Q0J6Z3]	GO:0006355	regulation of transcription, DNA-templated
OS08G0247700	12.0503	4.97564	19.125	3.84373	1.94251	0.0153952	0.766612	Up	0.0399488	0.0589541	0.0215433	0.18952	0.0301646	0.157337	protein_coding	Putative uncharacterized protein [Source:UniProtKB/TrEMBL%3BAcc:B9FZV9]	GO:0004672,GO:0004674,GO:0005524,GO:0006468,GO:0016020,GO:0016021,GO:0016772	protein kinase activity|protein serine/threonine kinase activity|ATP binding|protein phosphorylation|membrane|integral component of membrane|transferase activity, transferring phosphorus-containing groups
OS08G0290700	12.8793	6.18405	19.5745	3.16532	1.66235	0.00898184	0.601926	Up	0.110861	0.0812908	0.266434	0.378576	0.45056	0.690853	protein_coding	Os08g0290700 protein%3B Putative catechol O-methyltransferase [Source:UniProtKB/TrEMBL%3BAcc:Q6Z9P5]	GO:0008168,GO:0008171,GO:0008757,GO:0016740,GO:0019438,GO:0032259,GO:0046983	methyltransferase activity|O-methyltransferase activity|S-adenosylmethionine-dependent methyltransferase activity|transferase activity|aromatic compound biosynthetic process|methylation|protein dimerization activity
OS08G0378100	24.6815	15.7733	33.5897	2.12952	1.09053	0.0195016	0.81547	Up	3.79499	3.43141	0.884256	7.0316	5.52501	6.64738	protein_coding
OS08G0378300	13.3016	7.35406	19.2492	2.61749	1.38818	0.0283801	0.941473	Up	0.118392	0.262905	0.162947	0.497796	0.536526	0.428087	protein_coding	Putative uncharacterized protein [Source:UniProtKB/TrEMBL%3BAcc:B9G0N1]	GO:0004672,GO:0004674,GO:0005524,GO:0006468,GO:0016301,GO:0016310,GO:0016772	protein kinase activity|protein serine/threonine kinase activity|ATP binding|protein phosphorylation|kinase activity|phosphorylation|transferase activity, transferring phosphorus-containing groups
OS08G0386200	1647.42	1037.24	2257.6	2.17654	1.12204	0.0338353	0.982832	Up	37.4115	47.8075	150.62	162.532	188.082	234.752	protein_coding	Os08g0386200 protein%3B Putative transcription factor WRKY5%3B WRKY transcription factor%3B cDNA clone:J013102P22%2C full insert sequence [Source:UniProtKB/TrEMBL%3BAcc:Q6ZA22]	GO:0003700,GO:0006355,GO:0043565	transcription factor activity, sequence-specific DNA binding|regulation of transcription, DNA-templated|sequence-specific DNA binding
OS08G0400000	12.681	6.77814	18.5839	2.74174	1.45509	0.0232747	0.88986	Up	0.0701314	0.045545	0.0418743	0.155712	0.109588	0.114751	protein_coding	Histone-lysine N-methyltransferase-like protein%3B cDNA clone:J023022E24%2C full insert sequence [Source:UniProtKB/TrEMBL%3BAcc:Q6ZJS5]	GO:0008168,GO:0016740,GO:0032259,GO:0042393	methyltransferase activity|transferase activity|methylation|histone binding
OS08G0404000	35.4082	52.2631	18.5534	0.354999	-1.49411	0.000475304	0.0912863	Down	1.55847	2.67817	2.69676	1.30901	0.712295	0.498722	protein_coding	Os08g0404000 protein%3B Putative glucosyltransferase [Source:UniProtKB/TrEMBL%3BAcc:Q6ZBE1]	GO:0008152,GO:0016740,GO:0016757,GO:0016758,GO:0050403,GO:0050502	metabolic process|transferase activity|transferase activity, transferring glycosyl groups|transferase activity, transferring hexosyl groups|trans-zeatin O-beta-D-glucosyltransferase activity|cis-zeatin O-beta-D-glucosyltransferase activity
OS08G0410900	102.795	0.6669	204.923	307.277	8.2634	0.0275841	0.931129	Up	0	0.0216965	0.0239875	1.14108	7.13353	0.0432069	protein_coding
OS08G0410950	14.2208	6.1161	22.3254	3.65027	1.868	0.0332808	0.982832	Up	0.123131	0.0349636	0.100286	0.213716	0.539106	0.155732	protein_coding		GO:0006355	regulation of transcription, DNA-templated
OS08G0423500	241.644	346.34	136.948	0.395415	-1.33856	0.000734982	0.122078	Down	18.9615	11.9952	18.803	11.0404	6.27074	5.10606	protein_coding	Os08g0423500 protein%3B Putative dioscorin [Source:UniProtKB/TrEMBL%3BAcc:Q8GTK1]	GO:0004089,GO:0006730,GO:0008270,GO:0046872	carbonate dehydratase activity|one-carbon metabolic process|zinc ion binding|metal ion binding	dosa00910	Nitrogen metabolism
OS08G0436700	13.6261	19.42	7.83214	0.403302	-1.31007	0.0321168	0.973527	Down	0.448003	0.557985	0.276509	0.177602	0.183749	0.182202	protein_coding	Os08g0436700 protein%3B Putative NAC domain protein [Source:UniProtKB/TrEMBL%3BAcc:Q6Z538]	GO:0003677,GO:0005634,GO:0006351,GO:0006355	DNA binding|nucleus|transcription, DNA-templated|regulation of transcription, DNA-templated
OS08G0445000	7.43783	11.9144	2.9613	0.248549	-2.0084	0.0181474	0.804741	Down	0.491702	0.970025	0.288643	0.0530016	0.149234	0.15471	protein_coding	Os08g0445000 protein%3B Putative RING finger 1%3B cDNA clone:002-118-C12%2C full insert sequence [Source:UniProtKB/TrEMBL%3BAcc:Q6Z8P9]	GO:0008270,GO:0016021,GO:0046872	zinc ion binding|integral component of membrane|metal ion binding
OS08G0455900	96.3167	132.582	60.0518	0.452942	-1.1426	3.52e-05	0.0117936	Down	4.61503	5.05996	2.22335	1.4915	0.686849	1.80632	protein_coding	Putative copper transporter 5.2 [Source:UniProtKB/Swiss-Prot%3BAcc:Q6Z0Q9]	GO:0005375,GO:0016021,GO:0035434	copper ion transmembrane transporter activity|integral component of membrane|copper ion transmembrane transport
OS08G0460600	806.996	1081.48	532.511	0.49239	-1.02213	2.2e-07	0.000152518	Down	29.7851	32.2253	25.9883	19.9841	8.99239	12.0995	protein_coding		GO:0003824,GO:0009690,GO:0019139,GO:0050660,GO:0055114	catalytic activity|cytokinin metabolic process|cytokinin dehydrogenase activity|flavin adenine dinucleotide binding|oxidation-reduction process
OS08G0473900	18.3735	7.48266	29.2643	3.91095	1.96752	0.0312188	0.968203	Up	0.299323	0.249899	0.37052	0.588578	2.07905	1.18345	protein_coding	Alpha-amylase isozyme 3D [Source:UniProtKB/Swiss-Prot%3BAcc:P27933]	GO:0003824,GO:0004556,GO:0005509,GO:0005975,GO:0005983,GO:0005987,GO:0009737,GO:0009739,GO:0043169,GO:0048046	catalytic activity|alpha-amylase activity|calcium ion binding|carbohydrate metabolic process|starch catabolic process|sucrose catabolic process|response to abscisic acid|response to gibberellin|cation binding|apoplast	dosa00500	Starch and sucrose metabolism
OS08G0478000	27.0212	40.6907	13.3518	0.328128	-1.60767	0.000422893	0.083589	Down	4.30673	3.40541	3.16395	1.27158	0.857577	1.84432	protein_coding	Putative uncharacterized protein OJ1666_A04.17-2 [Source:UniProtKB/TrEMBL%3BAcc:Q6ZJC6]
OS08G0480050	4.91647	0.981538	8.8514	9.01789	3.17279	0.00883752	0.601851	Up	0	0	0	0.0405963	0.0392369	0.0401178	protein_coding
OS08G0481300	22.2509	30.5167	13.9851	0.458277	-1.12571	0.0199342	0.818296	Down	1.11124	0.440185	0.682837	0.589406	0.18737	0.242062	protein_coding
OS08G0482600	330.965	60.2886	601.642	9.97936	3.31895	0.00986703	0.633962	Up	1.62746	3.39987	12.5444	28.3207	103.164	39.6331	protein_coding	Os08g0482600 protein%3B Putative blue copper protein%3B cDNA clone:001-118-G07%2C full insert sequence [Source:UniProtKB/TrEMBL%3BAcc:Q6ZFF2]	GO:0005507,GO:0009055,GO:0016021,GO:0046658	copper ion binding|electron carrier activity|integral component of membrane|anchored component of plasma membrane
OS08G0496700	81.2518	22.8504	139.653	6.11163	2.61156	0.0167684	0.791509	Up	0.417591	0.524074	0.452325	2.71751	2.94077	0.424793	protein_coding	Putative uncharacterized protein [Source:UniProtKB/TrEMBL%3BAcc:A3BUG6]
OS08G0516900	549.832	357.527	742.136	2.07575	1.05363	0.0471901	1	Up	24.2305	28.3685	14.2302	33.5279	72.2987	42.762	protein_coding	Os08g0516900 protein%3B Putative uncharacterized protein P0686C03.145%3B Putative uncharacterized protein P0700D12.104 [Source:UniProtKB/TrEMBL%3BAcc:Q84JT9]
OS08G0529000	42.0072	56.6834	27.331	0.48217	-1.05239	0.00409776	0.395372	Down	2.11777	3.13024	2.36162	1.41307	0.589674	2.14314	protein_coding	Probable auxin efflux carrier component 4 [Source:UniProtKB/Swiss-Prot%3BAcc:Q6ZIB5]	GO:0005783,GO:0005886,GO:0009734,GO:0009926,GO:0010252,GO:0010315,GO:0010329,GO:0016021,GO:0055085,GO:0080161,GO:0080162	endoplasmic reticulum|plasma membrane|auxin-activated signaling pathway|auxin polar transport|auxin homeostasis|auxin efflux|auxin efflux transmembrane transporter activity|integral component of membrane|transmembrane transport|auxin transmembrane transporter activity|intracellular auxin transport
OS08G0531900	22.905	9.00493	36.805	4.08721	2.03112	5.54e-05	0.0169071	Up	0.142013	0.3225	0.19349	1.03013	0.917636	1.28786	protein_coding	Transcription factor MADS37 [Source:UniProtKB/TrEMBL%3BAcc:Q84NC0]	GO:0003677,GO:0005634,GO:0006351,GO:0006355,GO:0046983	DNA binding|nucleus|transcription, DNA-templated|regulation of transcription, DNA-templated|protein dimerization activity
OS08G0545000	568.065	360.151	775.979	2.1546	1.10742	0.0470838	1	Up	8.76546	10.5527	18.6986	19.5338	40.5227	27.0394	protein_coding	Os08g0545000 protein%3B Putative uncharacterized protein OJ1323_A06.1%3B Putative uncharacterized protein P0623F08.34%3B cDNA clone:J023097I24%2C full insert sequence [Source:UniProtKB/TrEMBL%3BAcc:Q6ZBH4]	GO:0003824,GO:0008152,GO:0030170	catalytic activity|metabolic process|pyridoxal phosphate binding
OS09G0256700	11.8432	16.8604	6.82596	0.40485	-1.30454	0.0494706	1	Down	2.41729	2.44131	2.28219	1.07286	0.439629	1.64846	protein_coding	Os09g0256700 protein%3B Putative uncharacterized protein P0523B07.19%3B cDNA clone:002-184-A12%2C full insert sequence [Source:UniProtKB/TrEMBL%3BAcc:Q6K419]
OS09G0266600	41.831	56.2078	27.4542	0.488441	-1.03374	0.00800492	0.573915	Down	2.08179	2.9847	4.06621	1.30005	1.22724	1.69107	protein_coding	Os09g0266600 protein [Source:UniProtKB/TrEMBL%3BAcc:Q0J331]	GO:0004871,GO:0007165,GO:0009416	signal transducer activity|signal transduction|response to light stimulus
OS09G0305300	237.041	318.013	156.069	0.490761	-1.02691	2.44e-06	0.00135948	Down	12.8177	14.3396	10.9351	7.37337	5.53354	5.83989	protein_coding	Os09g0305300 protein%3B cDNA clone:001-008-F02%2C full insert sequence%3B cDNA clone:J023147E24%2C full insert sequence [Source:UniProtKB/TrEMBL%3BAcc:Q0J2S9]	GO:0016021	integral component of membrane
OS09G0321900	45.363	61.5615	29.1644	0.473745	-1.07782	0.00234205	0.268538	Down	1.52078	2.0682	2.01812	0.698991	1.4421	1.09445	protein_coding	Os09g0321900 protein%3B Putative RUB1 conjugating enzyme%3B cDNA clone:J033069E18%2C full insert sequence [Source:UniProtKB/TrEMBL%3BAcc:Q69NC4]	GO:0005524,GO:0005737,GO:0009733,GO:0009790,GO:0016874,GO:0016881,GO:0019788,GO:0045116	ATP binding|cytoplasm|response to auxin|embryo development|ligase activity|acid-amino acid ligase activity|NEDD8 transferase activity|protein neddylation	dosa04120	Ubiquitin mediated proteolysis
OS09G0330700	3.42183	0.349829	6.49382	18.5628	4.21435	0.0151313	0.764976	Up	0	0	0.0183324	0.175637	0.107798	0.0178826	protein_coding	Ankyrin-like protein%3B Os09g0330700 protein [Source:UniProtKB/TrEMBL%3BAcc:Q6EPK9]	GO:0016021	integral component of membrane
OS09G0337500	84.8719	50.8172	118.927	2.34029	1.22668	2.1e-05	0.00776543	Up	0.327363	0.408632	0.388581	0.701384	0.975254	0.642426	protein_coding	Os09g0337500 protein [Source:UniProtKB/TrEMBL%3BAcc:C7J6H2]
OS09G0341600	114.794	51.4259	178.161	3.46443	1.79262	0.0397781	1	Up	0.964398	0.969043	3.21122	2.65725	9.69368	6.02551	protein_coding	Os09g0341600 protein%3B Putative uncharacterized protein OJ1116_F08.11%3B Putative uncharacterized protein P0448B03.22 [Source:UniProtKB/TrEMBL%3BAcc:Q6EQB2]
OS09G0345300	1329.82	879.034	1780.6	2.02563	1.01837	0.016007	0.77484	Up	4.83204	6.12622	5.74902	6.43938	14.7559	11.3174	protein_coding	Leucine-rich repeat family protein /protein kinase family protein-like [Source:UniProtKB/TrEMBL%3BAcc:Q6EQG8]	GO:0004672,GO:0004674,GO:0005524,GO:0005886,GO:0006468,GO:0016021,GO:0016301,GO:0016310,GO:0016772	protein kinase activity|protein serine/threonine kinase activity|ATP binding|plasma membrane|protein phosphorylation|integral component of membrane|kinase activity|phosphorylation|transferase activity, transferring phosphorus-containing groups
OS09G0359500	15.5406	23.9148	7.16635	0.299661	-1.7386	0.0423572	1	Down	0.19859	0.412347	0.118395	0.0269281	0	0.137086	protein_coding
OS09G0388400	19.318	26.5755	12.0605	0.453819	-1.13981	0.0304882	0.965278	Down	0.597939	0.519208	0.850057	0.313453	0.205512	0.320059	protein_coding	Haloacid dehalogenase-like hydrolase-like protein%3B Os09g0388400 protein%3B cDNA clone:J023027H14%2C full insert sequence [Source:UniProtKB/TrEMBL%3BAcc:Q6H5D1]	GO:0003824,GO:0005737,GO:0008152,GO:0016311,GO:0016787,GO:0016791,GO:0044283	catalytic activity|cytoplasm|metabolic process|dephosphorylation|hydrolase activity|phosphatase activity|small molecule biosynthetic process
OS09G0438100	86.2218	118.67	53.7738	0.453138	-1.14198	0.00133438	0.187096	Down	12.0946	11.0893	14.0013	8.72543	6.34435	2.2196	protein_coding	Os09g0438100 protein%3B Putative uncharacterized protein OJ1328_D07.26%3B Putative uncharacterized protein P0556H01.9%3B cDNA clone:001-112-A10%2C full insert sequence [Source:UniProtKB/TrEMBL%3BAcc:Q69LJ5]	GO:0016021	integral component of membrane
OS09G0459600	28.1594	14.4189	41.8999	2.90589	1.53898	0.000600193	0.106107	Up	0.164909	0.18295	0.124195	0.594442	0.707161	0.629592	protein_coding	Probable protein phosphatase 2C 69 [Source:UniProtKB/Swiss-Prot%3BAcc:Q67J17]	GO:0003824,GO:0004722,GO:0006470	catalytic activity|protein serine/threonine phosphatase activity|protein dephosphorylation
OS09G0470500	1493.04	2006.26	979.813	0.488377	-1.03393	9.55e-09	9.06e-06	Down	85.9465	97.1595	108.905	65.028	40.101	48.7944	protein_coding	Homeobox-leucine zipper protein HOX4 [Source:UniProtKB/Swiss-Prot%3BAcc:Q6K498]	GO:0000976,GO:0003677,GO:0003700,GO:0005634,GO:0006351,GO:0006355,GO:0043565	transcription regulatory region sequence-specific DNA binding|DNA binding|transcription factor activity, sequence-specific DNA binding|nucleus|transcription, DNA-templated|regulation of transcription, DNA-templated|sequence-specific DNA binding
OS09G0484200	35.7959	48.5787	23.013	0.473725	-1.07788	0.010239	0.647518	Down	3.55508	6.24693	5.04359	4.05034	1.20909	2.55709	protein_coding	Os09g0484200 protein%3B cDNA clone:J033073G16%2C full insert sequence [Source:UniProtKB/TrEMBL%3BAcc:Q0J0T7]
OS09G0486375	14.348	6.81576	21.8802	3.21024	1.68268	0.00566287	0.478285	Up	0.367198	0.173397	0.154438	0.363259	1.19175	1.06279	protein_coding
OS09G0522100	58.6015	37.5356	79.6675	2.12245	1.08573	0.0458999	1	Up	2.15079	1.28044	9.47063	8.9454	7.65595	7.81822	protein_coding	Dehydration-responsive element-binding protein 1H [Source:UniProtKB/Swiss-Prot%3BAcc:Q0J090]	GO:0003677,GO:0003700,GO:0006355	DNA binding|transcription factor activity, sequence-specific DNA binding|regulation of transcription, DNA-templated
OS09G0525500	2.52497	4.72408	0.325853	0.0689769	-3.85774	0.0431273	1	Down	0.864851	0.851726	0.808555	0	0	0	protein_coding	Protein YY1 [Source:UniProtKB/Swiss-Prot%3BAcc:O23810]	GO:0005548,GO:0005576,GO:0006649	phospholipid transporter activity|extracellular region|phospholipid transfer to membrane
OS09G0528000	14.9377	8.6551	21.2203	2.45177	1.29382	0.0310102	0.968203	Up	0.084311	0.177613	0.127439	0.310359	0.362587	0.386075	protein_coding	Os09g0528000 protein%3B Putative kinesin heavy chain%3B cDNA clone:J023134L05%2C full insert sequence [Source:UniProtKB/TrEMBL%3BAcc:Q651Z7]	GO:0000166,GO:0003777,GO:0005524,GO:0005871,GO:0005874,GO:0007018,GO:0008017,GO:0016887	nucleotide binding|microtubule motor activity|ATP binding|kinesin complex|microtubule|microtubule-based movement|microtubule binding|ATPase activity
OS09G0560850	2.10884	0	4.21768	Inf	Inf	0.0246534	0.908084	Up	0	0	0	0.0381652	0.0351307	0.0364776	protein_coding
OS09G0569700	18.8072	8.05372	29.5606	3.67043	1.87595	0.000637771	0.110017	Up	0.093992	0.115917	0.12438	0.685754	0.358288	0.422111	protein_coding	Os09g0569700 protein [Source:UniProtKB/TrEMBL%3BAcc:Q0IZH2]
OS10G0106550	4.04221	7.10007	0.984349	0.138639	-2.85059	0.0274554	0.931129	Down	2.54047	1.02681	2.06872	0	0.346297	0.721638	protein_coding
OS10G0118200	29.2156	46.0167	12.4145	0.269781	-1.89014	1.94e-05	0.00743039	Down	0.857089	1.55865	1.54938	0.227232	0.291298	0.549535	protein_coding
OS10G0162836	6.2065	10.1102	2.3028	0.22777	-2.13435	0.0260085	0.915506	Down	0.555378	0.558464	0.178163	0.0876781	0.0917584	0.0898741	protein_coding		GO:0004672,GO:0005524,GO:0006468	protein kinase activity|ATP binding|protein phosphorylation
OS10G0166600	26.4404	16.9636	35.9172	2.11731	1.08223	0.0155271	0.768604	Up	0.516742	0.471923	0.49409	1.35302	1.43672	0.808721	protein_coding	Cytochrome P450 family protein%2C expressed%3B Os10g0166600 protein [Source:UniProtKB/TrEMBL%3BAcc:Q10A27]	GO:0004497,GO:0005506,GO:0009055,GO:0016020,GO:0016491,GO:0016705,GO:0016709,GO:0020037,GO:0044550,GO:0046872,GO:0055114	monooxygenase activity|iron ion binding|electron carrier activity|membrane|oxidoreductase activity|oxidoreductase activity, acting on paired donors, with incorporation or reduction of molecular oxygen|oxidoreductase activity, acting on paired donors, with incorporation or reduction of molecular oxygen, NAD(P)H as one donor, and incorporation of one atom of oxygen|heme binding|secondary metabolite…
OS10G0181100	3.92307	0.317071	7.52908	23.7457	4.5696	0.00446048	0.412435	Up	0	0.0850636	0	0.448632	0.779949	0.710064	protein_coding	Expressed protein%3B Os10g0181100 protein%3B cDNA clone:002-143-A08%2C full insert sequence [Source:UniProtKB/TrEMBL%3BAcc:Q10A18]
OS10G0182300	27.6459	17.6741	37.6178	2.12841	1.08978	0.0129805	0.706431	Up	0.418113	0.136751	0.283783	0.35273	0.877236	0.421789	protein_coding
OS10G0207400	69.9298	36.9874	102.872	2.78127	1.47574	0.00155022	0.207462	Up	4.91012	5.63677	4.43216	9.68594	19.1994	11.3228	protein_coding	Os10g0207400 protein [Source:UniProtKB/TrEMBL%3BAcc:B9G7Y8]	GO:0016021	integral component of membrane
OS10G0210500	229.335	413.574	45.0959	0.10904	-3.19708	5.07e-07	0.000320664	Down	4.68855	11.2644	12.1226	1.23187	0.43427	0.667781	protein_coding	Nodulin MtN21 family protein%2C putative%2C expressed%3B Os10g0210500 protein%3B cDNA clone:J013110M15%2C full insert sequence [Source:UniProtKB/TrEMBL%3BAcc:Q33A72]	GO:0003333,GO:0005886,GO:0015171,GO:0016020,GO:0016021,GO:0022857,GO:0032973,GO:0043090,GO:0080144	amino acid transmembrane transport|plasma membrane|amino acid transmembrane transporter activity|membrane|integral component of membrane|transmembrane transporter activity|amino acid export|amino acid import|amino acid homeostasis
OS10G0315400	399.597	799.193	0	0	#NAME?	2.99e-139	4.25e-135	Down	5.58172	5.864	5.82113	0	0	0	protein_coding	CUE domain containing protein%2C expressed%3B Os10g0315400 protein%3B Putative uncharacterized protein OSJNBa0034E23.6 [Source:UniProtKB/TrEMBL%3BAcc:Q7XG35]
OS10G0320001	59.5251	119.05	0	0	#NAME?	1.29e-41	5.24e-38	Down	6.14391	6.88839	6.68223	0	0	0	protein_coding
OS10G0340100	7.72865	11.8496	3.60767	0.304455	-1.7157	0.0405228	1	Down	0.339771	0.449589	0.363077	0.0637338	0.127629	0.128283	protein_coding
OS10G0345600	34.6567	15.0325	54.2809	3.61091	1.85236	8.93e-06	0.00397123	Up	0.182806	0.504542	0.284799	0.843485	1.32828	1.00154	protein_coding	Expressed protein%3B Os10g0345600 protein%3B cDNA clone:J023043O20%2C full insert sequence [Source:UniProtKB/TrEMBL%3BAcc:Q339L3]
OS10G0345701	87.1265	29.1295	145.124	4.98201	2.31673	1.96e-14	3.09e-11	Up	0.854997	1.38514	0.861323	4.38329	5.38596	4.00176	protein_coding
OS10G0362700	51.9576	73.5967	30.3185	0.411955	-1.27944	0.000182891	0.0437448	Down	9.08013	8.06468	6.08943	4.14273	3.16211	3.50015	protein_coding	Expressed protein%3B Os10g0362700 protein%3B Putative uncharacterized protein OSJNBa0073L01.8%3B cDNA clone:002-148-A07%2C full insert sequence [Source:UniProtKB/TrEMBL%3BAcc:Q8S6P0]
OS10G0369500	10.5002	4.94288	16.0575	3.24862	1.69983	0.0201975	0.822435	Up	0.00959441	0.0748542	0	0.0798071	0.12209	0.0824969	protein_coding
OS10G0395000	195.983	109.279	282.686	2.58684	1.37119	2.07e-09	2.36e-06	Up	2.9036	3.1497	4.43473	9.01577	11.3422	9.80985	protein_coding	Os10g0395000 protein%3B Putative serine/threonine protein kinase%3B Serine/threonine-protein kinase NAK%2C putative%2C expressed [Source:UniProtKB/TrEMBL%3BAcc:Q8L4T2]	GO:0004672,GO:0004674,GO:0005524,GO:0006468,GO:0016301,GO:0016310,GO:0016772	protein kinase activity|protein serine/threonine kinase activity|ATP binding|protein phosphorylation|kinase activity|phosphorylation|transferase activity, transferring phosphorus-containing groups
OS10G0419400	99.2789	9.96101	188.597	18.9335	4.24287	0.00325862	0.342252	Up	0.152071	0.454948	0.165882	11.8386	4.58204	3.02366	protein_coding	1%2C2-dihydroxy-3-keto-5-methylthiopentene dioxygenase 1 [Source:UniProtKB/Swiss-Prot%3BAcc:A1L4T4]	GO:0005506,GO:0005634,GO:0005737,GO:0006555,GO:0008652,GO:0009086,GO:0010309,GO:0016491,GO:0019509,GO:0046872,GO:0051213,GO:0055114	iron ion binding|nucleus|cytoplasm|methionine metabolic process|cellular amino acid biosynthetic process|methionine biosynthetic process|acireductone dioxygenase [iron(II)-requiring] activity|oxidoreductase activity|L-methionine biosynthetic process from methylthioadenosine|metal ion binding|dioxygenase activity|oxidation-reduction process	dosa00270	Cysteine and methionine metabolism
OS10G0529700	199.646	275.114	124.178	0.451368	-1.14763	4.24e-07	0.000274348	Down	16.881	21.0895	18.0298	10.9375	5.78268	8.46313	protein_coding	Glutathione S-transferase GSTU6%2C putative%2C expressed%3B Putative glutathione S-transferase%3B Putative glutathione S-transferase OsGSTU8%3B cDNA clone:002-113-D07%2C full insert sequence [Source:UniProtKB/TrEMBL%3BAcc:Q945X0]	GO:0004364,GO:0005737,GO:0006749,GO:0009407,GO:0009507,GO:0009704,GO:0016740,GO:0046686,GO:0048527,GO:0060416,GO:0080167	glutathione transferase activity|cytoplasm|glutathione metabolic process|toxin catabolic process|chloroplast|de-etiolation|transferase activity|response to cadmium ion|lateral root development|response to growth hormone|response to karrikin
OS10G0542400	24.5009	13.8952	35.1065	2.52651	1.33715	0.0387066	1	Up	0.761118	1.00114	1.7882	2.61968	4.39155	2.41523	protein_coding	Expansin-like A2 [Source:UniProtKB/Swiss-Prot%3BAcc:Q7XCL0]	GO:0005576,GO:0005618,GO:0009505,GO:0009506,GO:0016020	extracellular region|cell wall|plant-type cell wall|plasmodesma|membrane
OS10G0543400	22.765	9.04499	36.485	4.03373	2.01211	0.0250852	0.910454	Up	0.405705	0.980146	0.655332	1.91886	7.03867	2.82044	protein_coding		GO:0004568,GO:0006032,GO:0016998	chitinase activity|chitin catabolic process|cell wall macromolecule catabolic process	dosa00520,dosa04016	Amino sugar and nucleotide sugar metabolism|MAPK signaling pathway - plant
OS10G0569600	55.7161	75.4767	35.9555	0.476379	-1.06982	0.0459125	1	Down	5.57836	2.43832	8.25137	1.77487	1.73557	7.00054	protein_coding	Os10g0569600 protein%3B Putative pathogen-related protein Rir1b [Source:UniProtKB/TrEMBL%3BAcc:Q8S7P6]
OS11G0103000	10.6784	15.8183	5.53854	0.350136	-1.51401	0.0308468	0.968203	Down	0.69048	0.722143	0.710562	0.161305	0.101507	0.471935	protein_coding	Os11g0103000 protein%3B Pentatricopeptide%2C putative [Source:UniProtKB/TrEMBL%3BAcc:Q2RBQ4]	GO:0003729,GO:0006397,GO:0009570	mRNA binding|mRNA processing|chloroplast stroma
OS11G0133800	16.172	8.18718	24.1569	2.95057	1.561	0.00613721	0.50364	Up	0.0598221	0.117474	0.235619	0.470706	0.495698	0.222807	protein_coding	Putative uncharacterized protein [Source:UniProtKB/TrEMBL%3BAcc:B9G990]	GO:0005886,GO:0008270,GO:0016021,GO:0019706,GO:0046872	plasma membrane|zinc ion binding|integral component of membrane|protein-cysteine S-palmitoyltransferase activity|metal ion binding
OS11G0173550	4.76487	0.317071	9.21267	29.0555	4.86074	0.00728727	0.548724	Up	0	0	0	0.0397324	0.143803	0.0413009	protein_coding
OS11G0213000	82.0683	20.8182	143.318	6.88427	2.7833	0.0111453	0.663018	Up	0.0284913	0.188719	0.250309	0.498338	1.85474	0.663835	protein_coding	Protein kinase domain containing protein%2C expressed [Source:UniProtKB/TrEMBL%3BAcc:Q2R8X2]	GO:0000166,GO:0004672,GO:0004674,GO:0005524,GO:0006468,GO:0016301,GO:0016310,GO:0016772	nucleotide binding|protein kinase activity|protein serine/threonine kinase activity|ATP binding|protein phosphorylation|kinase activity|phosphorylation|transferase activity, transferring phosphorus-containing groups
OS11G0213700	443.822	279.051	608.592	2.18093	1.12494	0.00981726	0.633625	Up	1.95363	2.41689	3.13077	3.46362	7.3346	5.33856	protein_coding	Os11g0213700 protein [Source:UniProtKB/TrEMBL%3BAcc:Q0ITV5]
OS11G0213733	9.41858	4.72165	14.1155	2.98953	1.57992	0.0372103	0.999051	Up	0.0787826	0.0623644	0	0.0891667	0.251402	0.15344	protein_coding
OS11G0214001	162.406	106.203	218.608	2.05841	1.04153	0.000204152	0.0461173	Up	2.00459	3.9053	2.62308	4.53965	6.29069	7.04442	protein_coding		GO:0006508,GO:0008234	proteolysis|cysteine-type peptidase activity
OS11G0214400	61.3786	122.757	0	0	#NAME?	2.48e-11	3.36e-08	Down	10.5876	14.0936	23.1086	0	0	0	protein_coding	Dirigent-like protein%2C expressed%3B Os11g0214400 protein%3B Uncharacterized protein [Source:UniProtKB/TrEMBL%3BAcc:Q2R8W3]
OS11G0214900	149.148	80.9922	217.303	2.68301	1.42385	0.0313228	0.968203	Up	6.86553	12.4682	10.172	16.4836	46.6792	37.0296	protein_coding	Dirigent-like protein%3B Os11g0214900 protein [Source:UniProtKB/TrEMBL%3BAcc:Q2R8V8]
OS11G0215100	80.2349	134.301	26.1692	0.194855	-2.35952	2.22e-14	3.33e-11	Down	13.9091	16.3987	16.7819	2.17121	3.4826	3.72901	protein_coding	Dirigent-like protein%2C expressed%3B Os11g0215100 protein%3B cDNA clone:002-132-D10%2C full insert sequence [Source:UniProtKB/TrEMBL%3BAcc:Q2R8V6]
OS11G0220300	111.692	43.1246	180.259	4.17996	2.06349	4.8e-06	0.00235389	Up	0.323192	0.34859	0.567638	1.3886	1.49984	0.971228	protein_coding	Expressed protein%3B Os11g0220300 protein%3B cDNA clone:J013164O07%2C full insert sequence [Source:UniProtKB/TrEMBL%3BAcc:Q2R8Q9]	GO:0009507	chloroplast
OS11G0222900	106.144	59.6991	152.588	2.55595	1.35386	0.000203868	0.0461173	Up	0.511177	0.580594	0.64767	1.83983	1.65974	1.02096	protein_coding	NB-ARC domain containing protein%2C expressed%3B NB-ARC domain%2C putative%3B Os11g0222900 protein [Source:UniProtKB/TrEMBL%3BAcc:Q53NZ3]	GO:0006952,GO:0043531	defense response|ADP binding
OS11G0224900	217.308	415.329	19.288	0.0464402	-4.42848	1.39e-49	6.6e-46	Down	2.6893	3.78913	3.81556	0.110421	0.135198	0.16733	protein_coding	NB-ARC domain containing protein%2C expressed%3B NB-ARC domain%2C putative%3B NBS-LRR type protein%3B Os11g0224900 protein [Source:UniProtKB/TrEMBL%3BAcc:Q53P15]	GO:0006952,GO:0043531	defense response|ADP binding
OS11G0225100	627.483	413.965	841.001	2.03158	1.0226	7.53e-08	5.96e-05	Up	3.54916	4.0315	4.24768	7.94185	8.27496	8.224	protein_coding
OS11G0225300	175.525	351.049	0	0	#NAME?	2.89e-89	2.74e-85	Down	3.41175	2.50566	3.33421	0	0	0	protein_coding	NB-ARC domain containing protein%2C expressed%3B NBS-LRR type protein%3B Os11g0225300 protein [Source:UniProtKB/TrEMBL%3BAcc:Q2R8L1]	GO:0006952,GO:0043531	defense response|ADP binding
OS11G0226201	309.666	600.994	18.339	0.0305145	-5.03436	3.49e-79	1.98e-75	Down	7.77597	8.54141	9.15583	0.0244929	0.0792255	0.0768546	protein_coding	Protein kinase domain containing protein%2C expressed [Source:UniProtKB/TrEMBL%3BAcc:Q2R8K3]	GO:0000166,GO:0004672,GO:0004674,GO:0005524,GO:0006468,GO:0016301,GO:0016310,GO:0016772	nucleotide binding|protein kinase activity|protein serine/threonine kinase activity|ATP binding|protein phosphorylation|kinase activity|phosphorylation|transferase activity, transferring phosphorus-containing groups
OS11G0226400	159.688	319.376	0	0	#NAME?	2.64e-84	1.88e-80	Down	3.61197	4.59583	3.9481	0	0	0	protein_coding	Os11g0226400 protein [Source:UniProtKB/TrEMBL%3BAcc:Q0ITR2]	GO:0006952,GO:0043531	defense response|ADP binding
OS11G0226700	53.1759	106.352	0	0	#NAME?	1.62e-32	4.62e-29	Down	0.635706	0.468358	0.425465	0	0	0	protein_coding	Os11g0226700 protein [Source:UniProtKB/TrEMBL%3BAcc:Q0ITR1]	GO:0043531	ADP binding
OS11G0226800	137.744	199.194	76.2955	0.383022	-1.3845	2.66e-08	2.23e-05	Down	1.75842	2.09635	1.49037	0.673843	0.602157	0.786481	protein_coding
OS11G0227100	292.091	408.704	175.479	0.429354	-1.21976	6.66e-09	6.54e-06	Down	5.93785	6.86608	6.13918	2.08054	2.67383	3.48086	protein_coding	Putative uncharacterized protein [Source:UniProtKB/TrEMBL%3BAcc:B9GA26]	GO:0006952,GO:0043531	defense response|ADP binding	dosa04626	Plant-pathogen interaction
OS11G0242200	6.57943	2.06622	11.0926	5.36857	2.42454	0.0105278	0.652838	Up	0	0.0839006	0.0860751	0.669871	0.404754	0.415001	protein_coding		GO:0003824,GO:0004722,GO:0006470	catalytic activity|protein serine/threonine phosphatase activity|protein dephosphorylation
OS11G0274100	39.0499	8.58229	69.5176	8.10012	3.01794	0.0193472	0.81547	Up	0.183443	0.292806	0.0485415	2.17786	0.444039	1.02424	protein_coding	Os11g0274300 protein%3B Protein kinase domain containing protein%3B Similar to stem rust resistance protein [Source:UniProtKB/TrEMBL%3BAcc:Q53QA3]	GO:0004672,GO:0004674,GO:0005198,GO:0005524,GO:0006468,GO:0016301,GO:0016310,GO:0016772	protein kinase activity|protein serine/threonine kinase activity|structural molecule activity|ATP binding|protein phosphorylation|kinase activity|phosphorylation|transferase activity, transferring phosphorus-containing groups
OS11G0278900	3.25976	0	6.51953	Inf	Inf	0.0156482	0.770579	Up	0	0	0	0.0865657	0.0570796	0	protein_coding
OS11G0302800	43.1713	22.0893	64.2534	2.9088	1.54043	0.000100478	0.0270993	Up	0.13918	0.350496	0.097036	0.500052	0.532378	0.6937	protein_coding	Os11g0302800 protein [Source:UniProtKB/TrEMBL%3BAcc:Q0IT67]
OS11G0308432	159.048	267.077	51.0181	0.191024	-2.38818	1.03e-09	1.22e-06	Down	2.22351	3.40619	2.75264	1.13614	0.199103	0.232005	protein_coding
OS11G0308600	56.9279	89.5239	24.3319	0.271793	-1.87942	8.11e-06	0.00372385	Down	13.4124	13.7963	16.8314	8.00944	3.11489	2.47446	protein_coding
OS11G0454000	16.2373	22.9822	9.49244	0.413035	-1.27567	0.030976	0.968203	Down	1.99006	0.648185	2.15732	0.418057	0.912422	0.839278	protein_coding	Dehydrin Rab16C [Source:UniProtKB/Swiss-Prot%3BAcc:Q2R4Z7]	GO:0006950,GO:0009415	response to stress|response to water
OS11G0461000	57.5164	81.9953	33.0374	0.402918	-1.31144	0.0277249	0.931129	Down	1.40008	1.59654	1.07739	0.143359	1.21847	0.180052	protein_coding	Os11g0461000 protein [Source:UniProtKB/TrEMBL%3BAcc:Q0ISU1]	GO:0004185,GO:0006508	serine-type carboxypeptidase activity|proteolysis
OS11G0470500	43.15	20.0057	66.2944	3.31378	1.72848	0.000168108	0.0408962	Up	0.302834	0.508885	0.347539	1.48685	0.846549	1.15874	protein_coding	Protein kinase domain containing protein%2C expressed [Source:UniProtKB/TrEMBL%3BAcc:Q2R4L1]	GO:0004672,GO:0004674,GO:0005524,GO:0006468,GO:0016301,GO:0016310,GO:0016772	protein kinase activity|protein serine/threonine kinase activity|ATP binding|protein phosphorylation|kinase activity|phosphorylation|transferase activity, transferring phosphorus-containing groups
OS11G0474500	22.9846	15.2618	30.7074	2.01204	1.00866	0.0341405	0.985217	Up	0.205407	0.277737	0.504392	0.548216	0.673266	0.742106	protein_coding	Os11g0474533 protein [Source:UniProtKB/TrEMBL%3BAcc:Q2R4H4]	GO:0043531	ADP binding
OS11G0481500	55.2227	31.8258	78.6197	2.47031	1.30469	0.00184825	0.232808	Up	3.4398	2.74746	4.07473	5.94351	11.0239	7.18426	protein_coding
OS11G0491600	14.0188	0	28.0376	Inf	Inf	0.00141932	0.193126	Up	0	0	0	0.508721	0.405888	0	protein_coding
OS11G0532200	68.2755	101.313	35.2378	0.347811	-1.52362	1.07e-06	0.000647492	Down	3.93716	4.41971	4.488	1.571	1.4176	1.59472	protein_coding
OS11G0597700	154.426	209.258	99.5936	0.475938	-1.07116	7.43e-05	0.0211427	Down	1.99529	2.26467	2.36795	1.60512	0.584932	0.965512	protein_coding
OS11G0598500	400.989	548.32	253.658	0.46261	-1.11213	0.0101705	0.646166	Down	2.61603	4.6751	2.51833	2.04193	1.22015	1.23312	protein_coding	Os11g0598500 protein [Source:UniProtKB/TrEMBL%3BAcc:Q0IRT6]	GO:0043531	ADP binding
OS11G0655900	6.89536	2.98224	10.8085	3.62429	1.8577	0.0421408	1	Up	0.212103	1.00819	0.585218	2.0082	3.02815	1.37273	protein_coding	Glutaredoxin-C10 [Source:UniProtKB/Swiss-Prot%3BAcc:Q2R076]	GO:0005634,GO:0005737,GO:0009055,GO:0015035,GO:0045454	nucleus|cytoplasm|electron carrier activity|protein disulfide oxidoreductase activity|cell redox homeostasis
OS11G0661800	271.33	162.442	380.217	2.34063	1.2269	3.55e-06	0.00183607	Up	2.29067	2.69508	4.7518	6.83326	8.30646	8.38663	protein_coding	Expressed protein%3B Os11g0661800 protein [Source:UniProtKB/TrEMBL%3BAcc:Q2R027]
OS11G0668650	26.12	17.2054	35.0347	2.03626	1.02592	0.0238979	0.899533	Up	0.124499	0.246768	0.12407	0.358039	0.532804	0.248863	protein_coding	Os11g0668600 protein [Source:UniProtKB/TrEMBL%3BAcc:Q0IR76]	GO:0005516,GO:0006950	calmodulin binding|response to stress
OS11G0670900	37.6606	51.3991	23.9222	0.46542	-1.10339	0.0184822	0.808117	Down	6.08791	6.8644	4.74138	5.64906	1.02923	1.99117	protein_coding	Expressed protein%3B Os11g0670900 protein%3B cDNA clone:002-141-D12%2C full insert sequence [Source:UniProtKB/TrEMBL%3BAcc:Q2QZU6]	GO:0016021	integral component of membrane
OS11G0678400	3.43184	0.634142	6.22954	9.82357	3.29625	0.0306383	0.968203	Up	0	0.0258322	0	0	0.0541584	0.0793008	protein_coding	NB-ARC domain containing protein%2C expressed [Source:UniProtKB/TrEMBL%3BAcc:Q2QZP0]	GO:0006952,GO:0043531	defense response|ADP binding	dosa04626	Plant-pathogen interaction
OS11G0690332	12.2065	18.5622	5.85081	0.3152	-1.66566	0.0119324	0.680623	Down	0.157282	0.0777584	0.078227	0.0817926	0	0.0801296	protein_coding		GO:0030247	polysaccharide binding
OS11G0701600	11.7369	18.2581	5.21561	0.28566	-1.80763	0.024307	0.904379	Down	3.74273	0.938768	4.53065	1.43906	0.699349	1.78516	protein_coding	Os11g0701600 protein [Source:UniProtKB/TrEMBL%3BAcc:Q0IQX7]	GO:0003824,GO:0004553,GO:0005975	catalytic activity|hydrolase activity, hydrolyzing O-glycosyl compounds|carbohydrate metabolic process
OS12G0117700	238.456	4.94288	471.969	95.4846	6.5772	0.00986056	0.633962	Up	0.798697	1.61837	0.43399	83.1848	233.356	1.67963	protein_coding
OS12G0133300	89.4578	122.025	56.8907	0.466222	-1.10091	0.00834726	0.586637	Down	0.694123	0.83446	0.619766	0.397791	0.522572	0.357968	protein_coding
OS12G0161100	28.2962	17.7057	38.8867	2.19628	1.13506	0.00956856	0.62652	Up	1.36529	1.04039	2.494	2.13319	3.36342	3.04334	protein_coding	Os12g0161100 protein%3B U-box domain containing protein%2C expressed [Source:UniProtKB/TrEMBL%3BAcc:Q2QXD4]	GO:0000151,GO:0000165,GO:0002679,GO:0004842,GO:0006499,GO:0006612,GO:0006952,GO:0009595,GO:0009627,GO:0009693,GO:0009697,GO:0009862,GO:0009867,GO:0010310,GO:0010363,GO:0016567,GO:0016874,GO:0031348,GO:0035556,GO:0042742,GO:0043069,GO:0043900,GO:0050832,GO:0051865	ubiquitin ligase complex|MAPK cascade|respiratory burst involved in defense response|ubiquitin-protein transferase activity|N-terminal protein myristoylation|protein targeting to membrane|defense response|detection of biotic stimulus|systemic acquired resistance|ethylene biosynthetic process|salicylic acid biosynthetic process|systemic acquired resistance, salicylic acid mediated signaling pathwa…
OS12G0169300	5.52601	0.664467	10.3876	15.6329	3.96651	0.0272652	0.928937	Up	0	0.0283172	0	0.204366	0.0314707	0.488131	protein_coding	Os12g0169300 protein [Source:UniProtKB/TrEMBL%3BAcc:Q0IPT4]
OS12G0170800	21.7394	14.1213	29.3575	2.07894	1.05585	0.0324099	0.975029	Up	0.299893	0.879932	1.15395	2.06759	1.87027	1.34294	protein_coding	Citrate binding protein%2C putative%2C expressed%3B Os12g0170800 protein%3B cDNA clone:006-201-D04%2C full insert sequence%3B cDNA clone:006-205-A05%2C full insert sequence [Source:UniProtKB/TrEMBL%3BAcc:Q2QX37]
OS12G0194900	170.99	231.648	110.331	0.476288	-1.07009	0.0318425	0.968304	Down	6.04853	14.397	11.8613	7.08286	2.27572	6.64228	protein_coding	Amino acid permease I%2C putative%2C expressed%3B Os12g0194900 protein [Source:UniProtKB/TrEMBL%3BAcc:Q2QWH7]	GO:0003333,GO:0005886,GO:0015171,GO:0016020,GO:0016021	amino acid transmembrane transport|plasma membrane|amino acid transmembrane transporter activity|membrane|integral component of membrane
OS12G0198200	128.783	85.4951	172.071	2.01264	1.00909	0.0467529	1	Up	0.977647	3.53913	3.29615	4.42003	5.58232	4.10468	protein_coding	Probable protein phosphatase 2C 77 [Source:UniProtKB/Swiss-Prot%3BAcc:Q2QWE3]	GO:0003824,GO:0004721,GO:0004722,GO:0006470,GO:0016787,GO:0046872	catalytic activity|phosphoprotein phosphatase activity|protein serine/threonine phosphatase activity|protein dephosphorylation|hydrolase activity|metal ion binding
OS12G0207500	16.6833	9.93989	23.4266	2.35683	1.23685	0.0240453	0.899533	Up	0	0	0	0	0.0348709	0	protein_coding	ATP synthase subunit beta [Source:UniProtKB/TrEMBL%3BAcc:Q0IPF8]	GO:0000166,GO:0005524,GO:0005618,GO:0006754,GO:0006810,GO:0006811,GO:0008270,GO:0009409,GO:0009507,GO:0009535,GO:0009570,GO:0009579,GO:0009817,GO:0010287,GO:0010319,GO:0015986,GO:0015991,GO:0015992,GO:0016020,GO:0016820,GO:0017111,GO:0031977,GO:0033178,GO:0045261,GO:0046034,GO:0046933	nucleotide binding|ATP binding|cell wall|ATP biosynthetic process|transport|ion transport|zinc ion binding|response to cold|chloroplast|chloroplast thylakoid membrane|chloroplast stroma|thylakoid|defense response to fungus, incompatible interaction|plastoglobule|stromule|ATP synthesis coupled proton transport|ATP hydrolysis coupled proton transport|proton transport|membrane|hydrolase activity, ac…	dosa00190,dosa00195	Oxidative phosphorylation|Photosynthesis
OS12G0222800	123.09	46.0337	200.147	4.34783	2.1203	0.0179116	0.804632	Up	0.427269	0.855497	0.189079	2.52621	0.776798	3.00243	protein_coding	Leucine Rich Repeat family protein%2C expressed [Source:UniProtKB/TrEMBL%3BAcc:Q2QVP4]
OS12G0472300	19.1114	10.0698	28.1529	2.79578	1.48325	0.0291487	0.949267	Up	0.111792	0.108497	0.909413	0.674416	0.64595	1.22087	protein_coding
OS12G0512000	6.21423	10.8099	1.6186	0.149734	-2.73953	0.00669053	0.524608	Down	0.578871	0.446484	0.579833	0.115494	0	0.114757	protein_coding	Expressed protein%3B Os12g0512000 protein [Source:UniProtKB/TrEMBL%3BAcc:Q2QPZ6]	GO:0004497,GO:0004499,GO:0016491,GO:0050660,GO:0050661,GO:0055114	monooxygenase activity|N,N-dimethylaniline monooxygenase activity|oxidoreductase activity|flavin adenine dinucleotide binding|NADP binding|oxidation-reduction process	dosa00380	Tryptophan metabolism
OS12G0516000	173.447	254.147	92.7469	0.364935	-1.45429	0.000783239	0.127061	Down	28.4554	49.2848	31.4391	14.0602	24.2143	6.93794	protein_coding	Expressed protein%3B Os12g0516000 protein [Source:UniProtKB/TrEMBL%3BAcc:Q2QPV8]
OS12G0528801	87.2153	45.1726	129.258	2.86143	1.51673	1.59e-07	0.000116001	Up	14.2722	10.0281	3.15283	25.1919	17.744	22.3619	protein_coding
OS12G0592900	65.2619	27.5086	103.015	3.74483	1.9049	0.00561282	0.476889	Up	2.32269	3.48412	5.65786	10.5123	22.6462	9.56155	protein_coding	Expressed protein%3B Os12g0592900 protein%3B cDNA clone:001-125-F07%2C full insert sequence%3B cDNA clone:002-188-E08%2C full insert sequence [Source:UniProtKB/TrEMBL%3BAcc:Q2QMS6]
OS12G0595600	17.5687	28.6009	6.53647	0.228541	-2.12948	0.0001705	0.0411266	Down	2.65907	1.4205	1.52735	0.590168	0.274441	1.14705	protein_coding	Putative uncharacterized protein [Source:UniProtKB/TrEMBL%3BAcc:B9GE25]	GO:0006511	ubiquitin-dependent protein catabolic process
OS12G0603700	129.238	189.496	68.9798	0.364016	-1.45792	1.01e-08	9.28e-06	Down	12.3076	17.3256	12.944	7.43079	4.6206	5.9927	protein_coding		GO:0004672,GO:0005524,GO:0006468	protein kinase activity|ATP binding|protein phosphorylation
OS12G0636400	21.2951	11.2374	31.3528	2.79005	1.48029	0.00303511	0.322345	Up	0.216935	0.383792	0.683984	1.10116	1.33199	0.989768	protein_coding	Hydrolase%2C alpha/beta fold family protein%2C expressed%3B Os12g0636400 protein [Source:UniProtKB/TrEMBL%3BAcc:Q2QLM4]	GO:0003824,GO:0004301,GO:0005829,GO:0008152,GO:0016787	catalytic activity|epoxide hydrolase activity|cytosol|metabolic process|hydrolase activity
