# Supplementary material for: Overexpression of Arabidopsis Nucleotide-Binding and Leucine-Rich Repeat Genes RPS2 and RPM1(D505V) Confers Broad-Spectrum Disease Resistance in Rice
Source: Front Plant Sci. 2019 Apr 5;10:417. doi: 10.3389/fpls.2019.00417 (PMC6459959; doi:10.3389/fpls.2019.00417)
Supplement: TABLE S5 — Co-regulated genes in AtRPS2 and AtRPM1(D505V) transgenic plants. [file Table_5.XLS]

## Sheet: Sheet1
TABLE S5. Co-regulated genes in AtRPS2 and AtRPM1(D505V) transgenic plants
id	foldChange	log2FoldChange	up_down	fpkm_Sample_WT_1	fpkm_Sample_WT_2	fpkm_Sample_WT_3	fpkm_Sample_B	fpkm_Sample_C	fpkm_Sample_D	description
OS01G0267300	70.1482	6.13233	Up	0	0	0	0.815757	1.96009	3.44009	Putative serpin-Z12, extracellular space
OS07G0538000	27.0246	4.7562	Up	0	0.0254653	0	0.0259618	0.378847	0.256537	Glucan endo-1,3-beta-glucosidase 13, PR8 family
OS10G0419400	18.9335	4.24287	Up	0.152071	0.454948	0.165882	11.8386	4.58204	3.02366	C2-dihydroxy-3-keto-5-methylthiopentene dioxygenase 1,methionine metabolic process
OS06G0268500	12.2764	3.61781	Up	0.119711	0.107263	0.0754526	1.12365	0.938489	1.30579	Putative NB-LRR protein
OS11G0274100	8.10012	3.01794	Up	0.183443	0.292806	0.0485415	2.17786	0.444039	1.02424	Putative receptor-like protein kinase, similar to stem rust resistance protein
OS11G0213000	6.88427	2.7833	Up	0.0284913	0.188719	0.250309	0.498338	1.85474	0.663835	Serine/threonine-protein kinase 3
OS06G0564700	5.72926	2.51835	Up	0.0415342	0.183786	0.373831	0.573021	1.8156	0.586934	Cysteine synthase, cysteine biosynthetic process from serine
OS03G0115700	4.8453	2.27659	Up	0.129509	0.382274	0.491485	1.65569	1.48107	1.66988	Short-chain dehydrogenase TIC 32, chloroplastic,metabolic process,oxidoreductase activity
OS08G0473900	3.91095	1.96752	Up	0.299323	0.249899	0.37052	0.588578	2.07905	1.18345	Alpha-amylase isozyme 3D-like,starch catabolic process|sucrose catabolic process
OS11G0655900	3.62429	1.8577	Up	0.212103	1.00819	0.585218	2.0082	3.02815	1.37273	Glutaredoxin-C10,protein disulfide oxidoreductase activity|cell redox homeostasis
OS11G0470500	3.31378	1.72848	Up	0.302834	0.508885	0.347539	1.48685	0.846549	1.15874	Putative receptor-like protein kinase
OS06G0707733	3.18154	1.66973	Up	0.043262	0.054655	0.00670389	0.128195	0.0930794	0.133033	Putative NB-LRR protein protein
OS02G0731700	2.96077	1.56597	Up	11.7543	11.5883	8.95811	13.5868	45.136	41.0228	BBX family，responses to biotic and abiotic stresses
OS12G0636400	2.79005	1.48029	Up	0.216935	0.383792	0.683984	1.10116	1.33199	0.989768	Epoxide hydrolase A, cytosol|metabolic process|hydrolase activity
OS08G0170700	2.55337	1.3524	Up	0.124368	0.122085	0.16757	0.436624	0.305967	0.157613	Putative NB-LRR protein
OS04G0339800	2.33562	1.22381	Up	1.1889	1.18985	1.04948	0.672251	1.57937	0.449161	Mitogen-activated protein kinase kinase kinase 1
OS05G0208500	0.484361	-1.04585	Down	22.0504	22.2523	27.1346	7.50002	11.1992	12.5316	2-beta-dioxygenase 1
OS09G0388400	0.453819	-1.13981	Down	0.597939	0.519208	0.850057	0.313453	0.205512	0.320059	HAD superfamily hydrolase-like, type 3 domain containing protein
OS11G0227100	0.429354	-1.21976	Down	5.93785	6.86608	6.13918	2.08054	2.67383	3.48086	Putative NB-LRR protein
OS11G0454000	0.413035	-1.27567	Down	1.99006	0.648185	2.15732	0.418057	0.912422	0.839278	Dehydrin Rab16C, response to stress|response to water
OS11G0461000	0.402918	-1.31144	Down	1.40008	1.59654	1.07739	0.143359	1.21847	0.180052	Anthocyanidin 3-O-glucosyltransferase，serine-type carboxypeptidase activity|proteolysis
OS08G0113000	0.395535	-1.33812	Down	2.66614	2.51739	3.58919	1.496	1.1107	1.01738	PR9 family|response to oxidative stress|phenylpropanoid metabolic process|response to nitrate|nitrate transport|hydrogen peroxide catabolic process
OS08G0423500	0.395415	-1.33856	Down	18.9615	11.9952	18.803	11.0404	6.27074	5.10606	Putative dioscorin,carbonate dehydratase activity|one-carbon metabolic process|Nitrogen metabolism
OS03G0292700	0.378689	-1.40091	Down	9.11971	12.5641	13.0117	4.51535	3.60185	5.11139	Mitogen-activated protein kinase kinase kinase ANP1, elicitor-induced oxidative burst and immunity
OS06G0229800	0.373826	-1.41956	Down	0.594875	0.396964	0.682777	0.265051	0.129409	0.219298	soluble starch synthase 2-3, chloroplastic/amyloplastic-like
OS01G0946500	0.371063	-1.43026	Down	6.29196	8.34683	8.00394	0.544742	3.99271	3.92492	Glucan endo-1,3-beta-glucosidase GV|response to bacterium|defense response to fungus, incompatible interaction
OS04G0314100	0.361223	-1.46904	Down	2.55965	2.04748	3.34739	1.71015	0.540714	1.24069	Cytokinin-O-glucosyltransferase 2
OS02G0685200	0.350574	-1.51221	Down	0.5005	0.391598	0.684576	0.235316	0.195679	0.0997452	MYB transcription factor, Transcriptional activator in mediating stress and rhythm responsivegene expression
OS01G0192900	0.318339	-1.65136	Down	1.29147	1.00205	1.21425	0.727934	0.183925	0.127536	1-aminocyclopropane-1-carboxylate synthase 7, ethylene synthesis, Cysteine and methionine metabolism
OS10G0162836	0.22777	-2.13435	Down	0.555378	0.558464	0.178163	0.0876781	0.0917584	0.0898741	Wall-associated receptor kinase 1
OS04G0175600	0.196881	-2.3446	Down	19.8985	23.1582	21.0974	2.98027	5.74275	3.64215	O-methyltransferase activity|S-adenosylmethionine-dependent methyltransferase activity
OS11G0215100	0.194855	-2.35952	Down	13.9091	16.3987	16.7819	2.17121	3.4826	3.72901	Dirigent protein 1, lignan and lignin biosynthesis
OS10G0210500	0.10904	-3.19708	Down	4.68855	11.2644	12.1226	1.23187	0.43427	0.667781	WAT1-related protein,vascular immunity, Nodulin MtN21 family protein, amino acid transmembrane transport
OS11G0224900	0.0464402	-4.42848	Down	2.6893	3.78913	3.81556	0.110421	0.135198	0.16733	Putative NB-LRR protein
OS11G0226201	0.0305145	-5.03436	Down	7.77597	8.54141	9.15583	0.0244929	0.0792255	0.0768546	LRR receptor-like serine/threonine-protein kinase HSL2, cell-wall remodeling
OS11G0214400	0	-Inf	Down	10.5876	14.0936	23.1086	0	0	0	Plant disease resistance response protein family protein
OS11G0225300	0	-Inf	Down	3.41175	2.50566	3.33421	0	0	0	Putative NB-LRR protein
OS11G0226400	0	-Inf	Down	3.61197	4.59583	3.9481	0	0	0	Similar to Nitrate-induced NOI protein, expressed
